# Supplementary material for: Molecular iodine catalyzed one-pot multicomponent reactions for the synthesis of dihydrochromeno[4,3-b]pyrazolo[4,3-e]pyridin-6(7H)-ones
Source: Royal Society of Chemistry journal article supplement (doi:10.1039/c3ra41569d), 2013-01-01

## Supporting information

# **Molecular Iodine Catalyzed One-Pot Multicomponent Reactions for the Synthesis of Dihydrochromeno [4, 3-b] Pyrazolo [4, 3-e] Pyridin-6(7H)-ones**

Suman Pal, Md. Nasim Khan, Shaik Karamthulla and Lokman H. Choudhury\*

*Department of Chemistry, Indian Institute of Technology Patna, Patna-800 013, Bihar,INDIA*

*E-mail: lokman@iitp.ac.in ; Tel: +916122552038 ; Fax: +916122277383*

## **Table of contents**

|                                                                                                     |      |
|-----------------------------------------------------------------------------------------------------|------|
| Title page.....                                                                                     | 1    |
| General experimental information.....                                                               | 2    |
| <sup>1</sup> H and <sup>13</sup> C NMR spectrum of compounds ( <b>1a-1p</b> and <b>2a-2d</b> )..... | 3-22 |

## General experimental information

All reagents were purchased from commercial sources (Sigma Aldrich, Merck, Avra) and used without further purification. 4-hydroxy-6-nitro-2H-chromen-2-one was prepared according to the literature method.<sup>20</sup> IR spectra were recorded in Shimadzu FTIR spectrophotometer. <sup>1</sup>H and <sup>13</sup>C NMR spectra were recorded on Jeol 500 MHz and Bruker 500 MHz or 400 MHz spectrometer in DMSO-d<sub>6</sub> or DMSO-d<sub>6</sub> + CDCl<sub>3</sub> using TMS as internal reference. Elemental analyses were carried out in a Perkin Elmer 2400 automatic carbon, hydrogen and nitrogen analyzer. All compounds were characterized by usual spectroscopic techniques. For compound **1a**, Single crystal XRD was recorded in *Bruker* Nonius Smart Apex II X-ray Single crystal diffractometer(CCD)

20. Huang, C-N.; Kuo, P-Y.; Lin, C-H.; Yang, D-Y. *Tetrahedron* **2007**, *63*, 10025–10033.

Copies of <sup>1</sup>H and <sup>13</sup>C NMR spectra of compound 1a

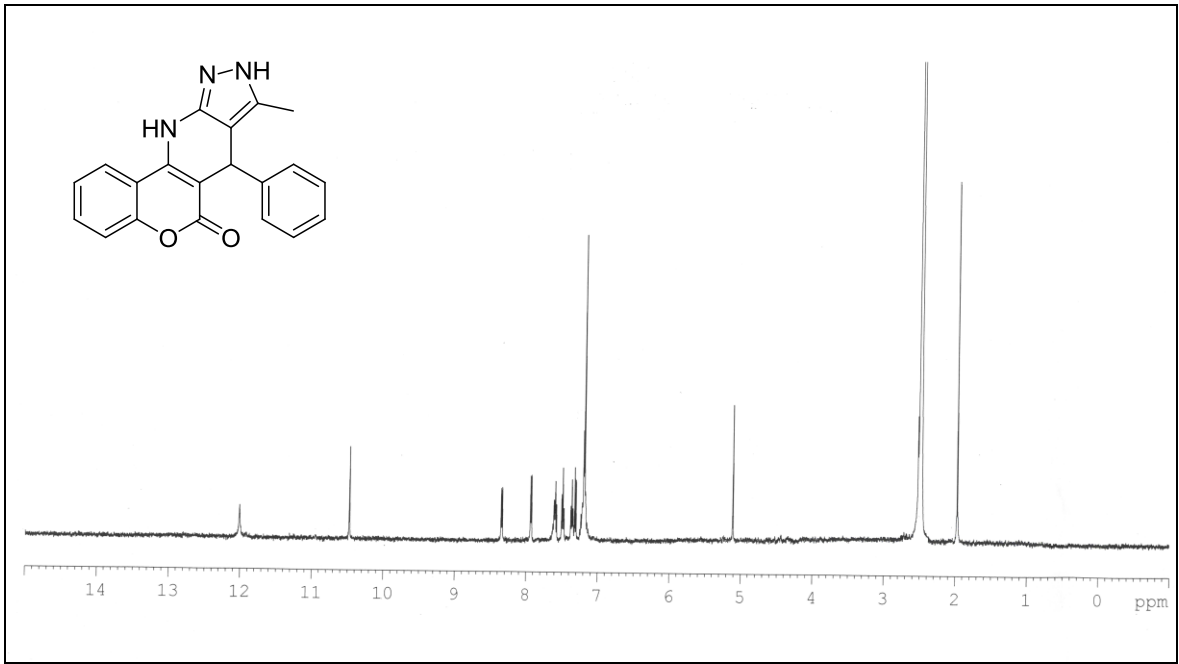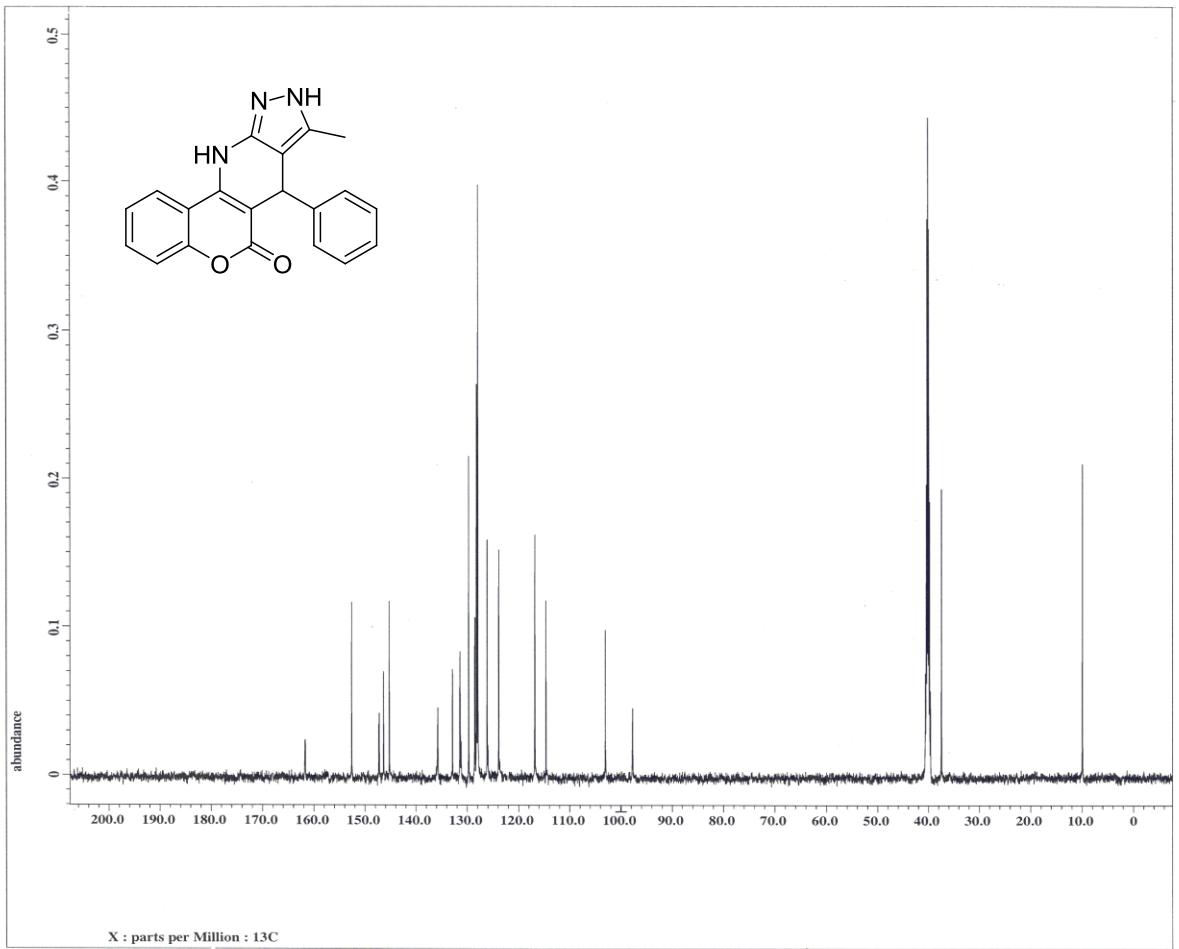

# Copies of $^1\text{H}$ and $^{13}\text{C}$ NMR spectra of compound 1b

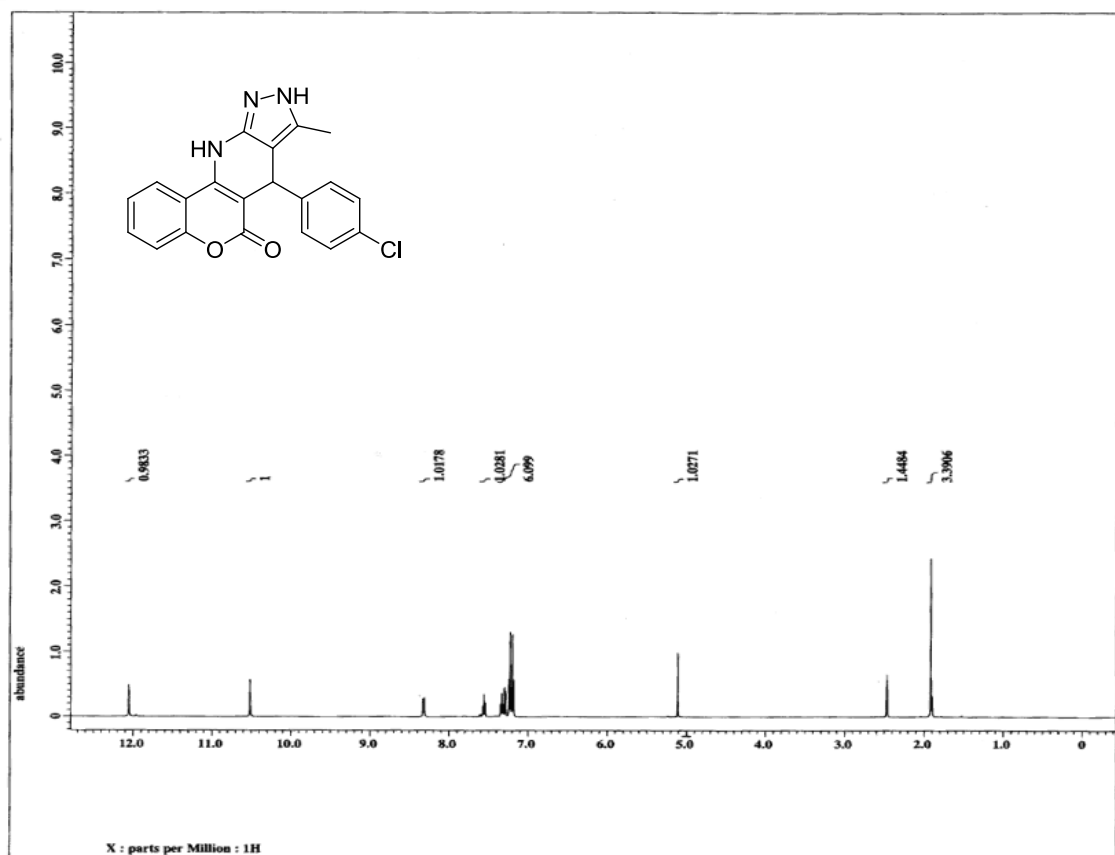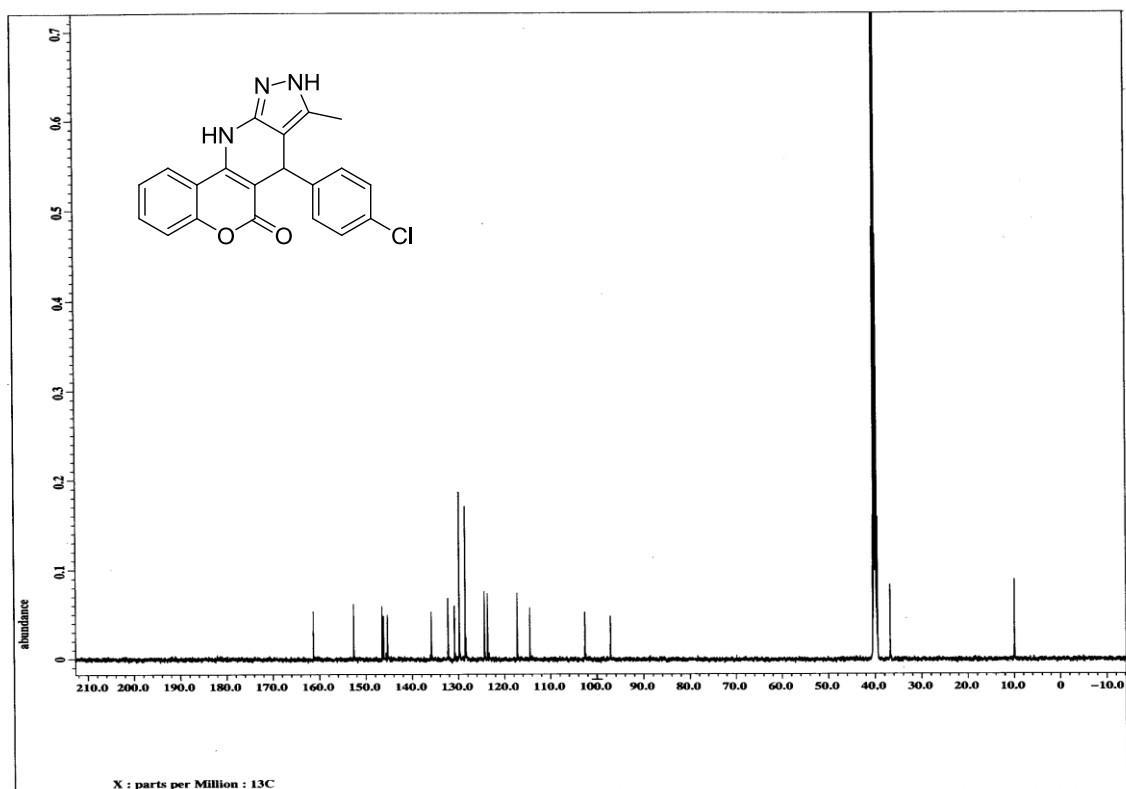

# Copies of $^1\text{H}$ and $^{13}\text{C}$ NMR spectra of compound 1c

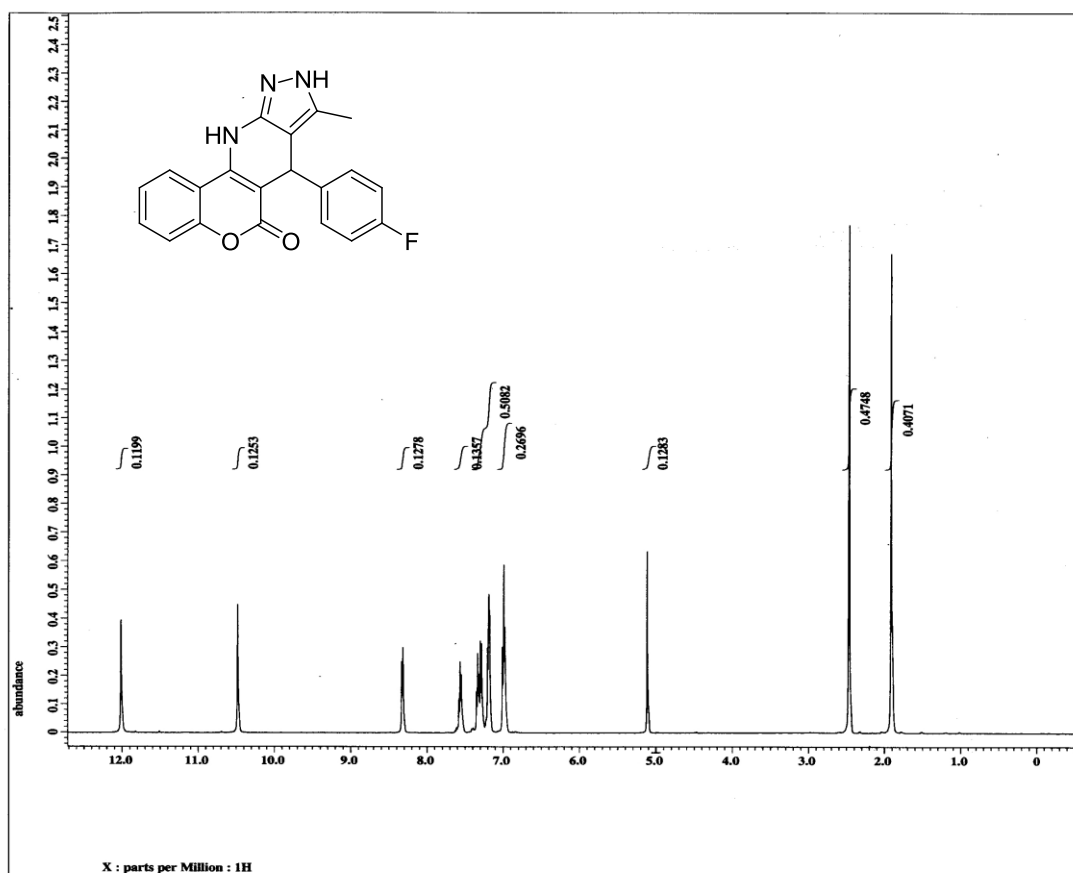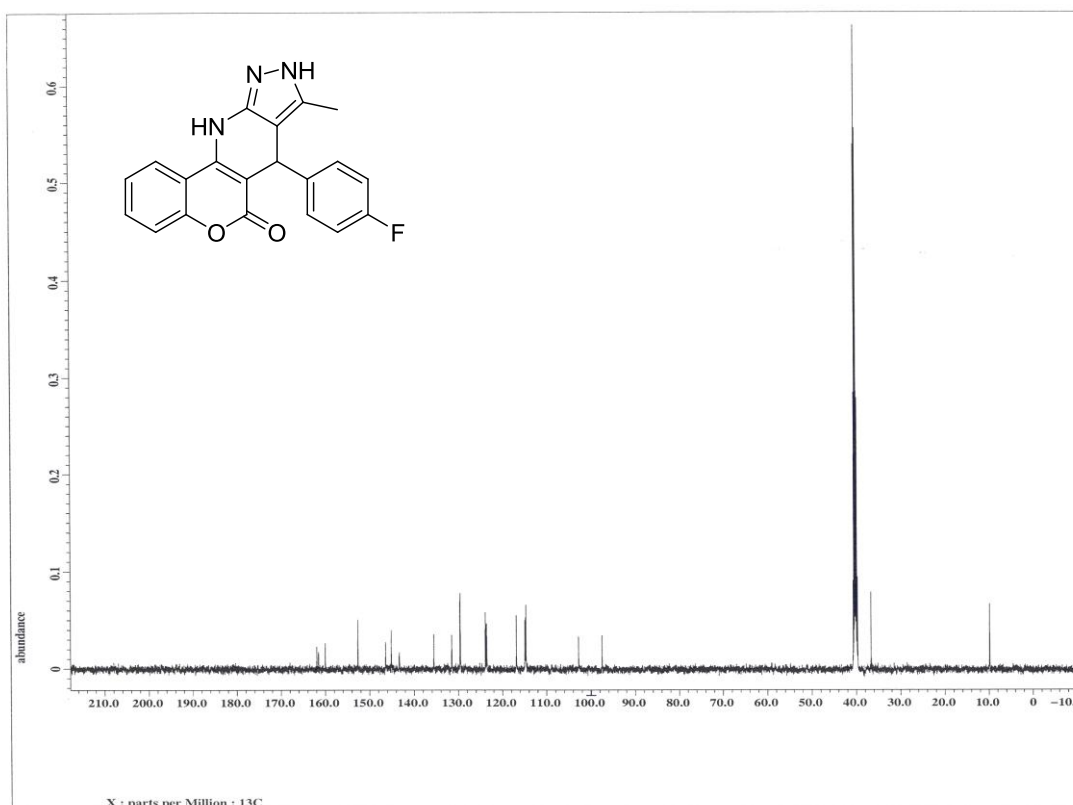

### Copies of $^1\text{H}$ and $^{13}\text{C}$ NMR spectra of compound 1d

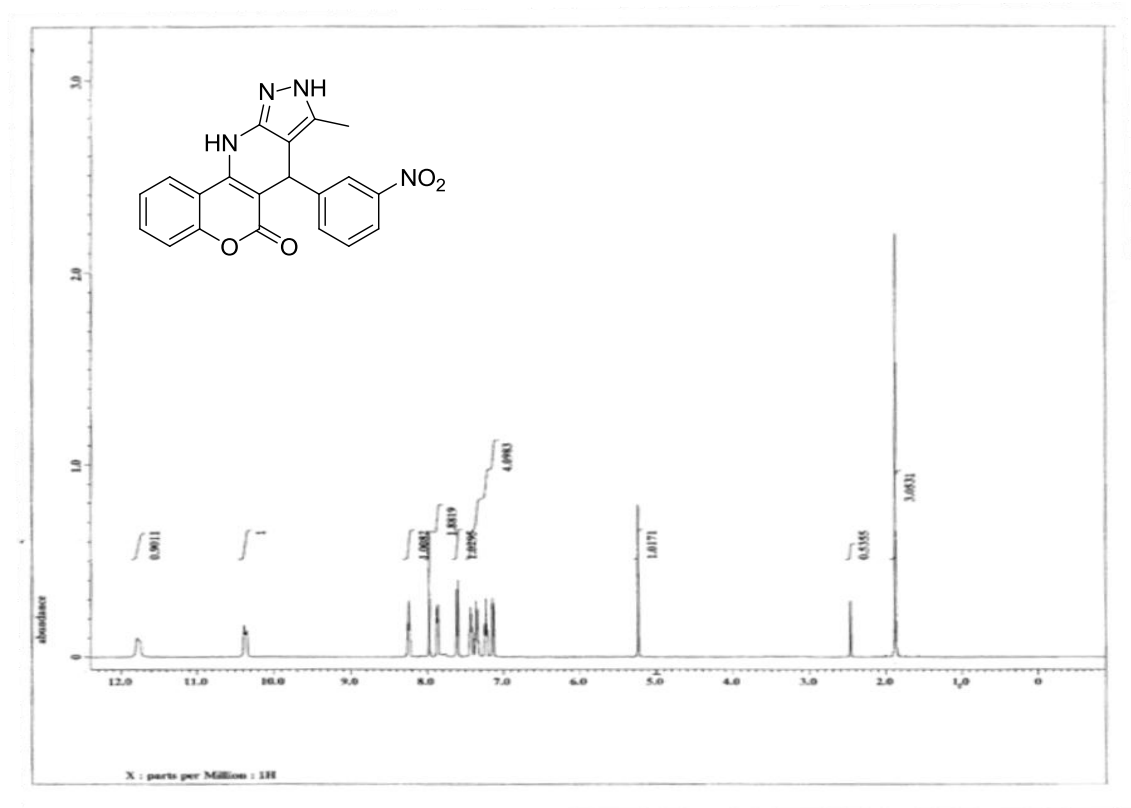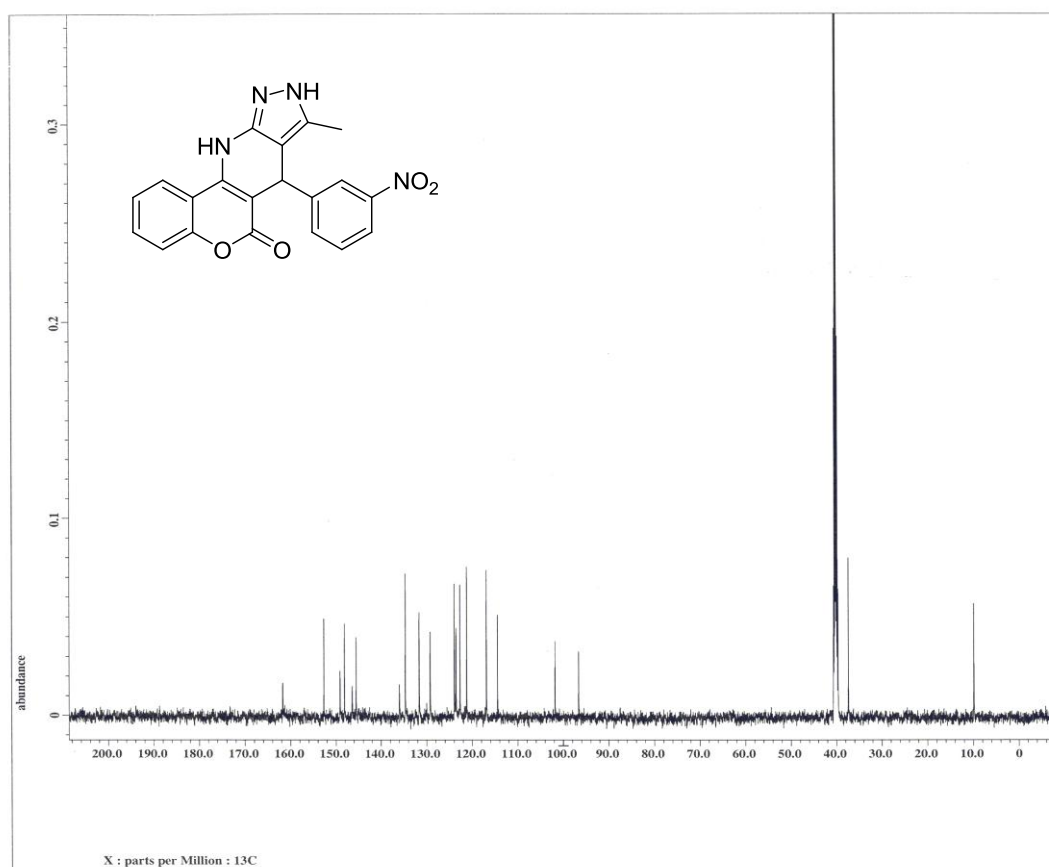

## Copies of $^1\text{H}$ and $^{13}\text{C}$ NMR spectra of compound 1e

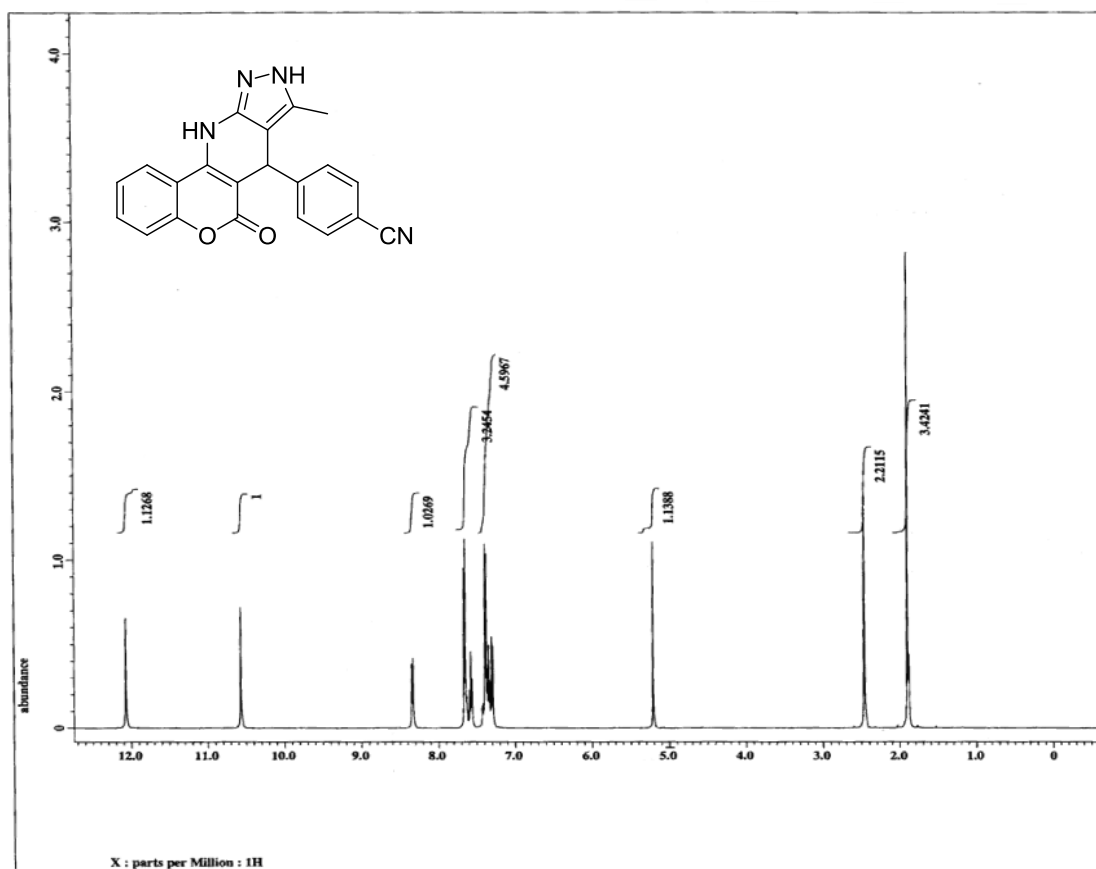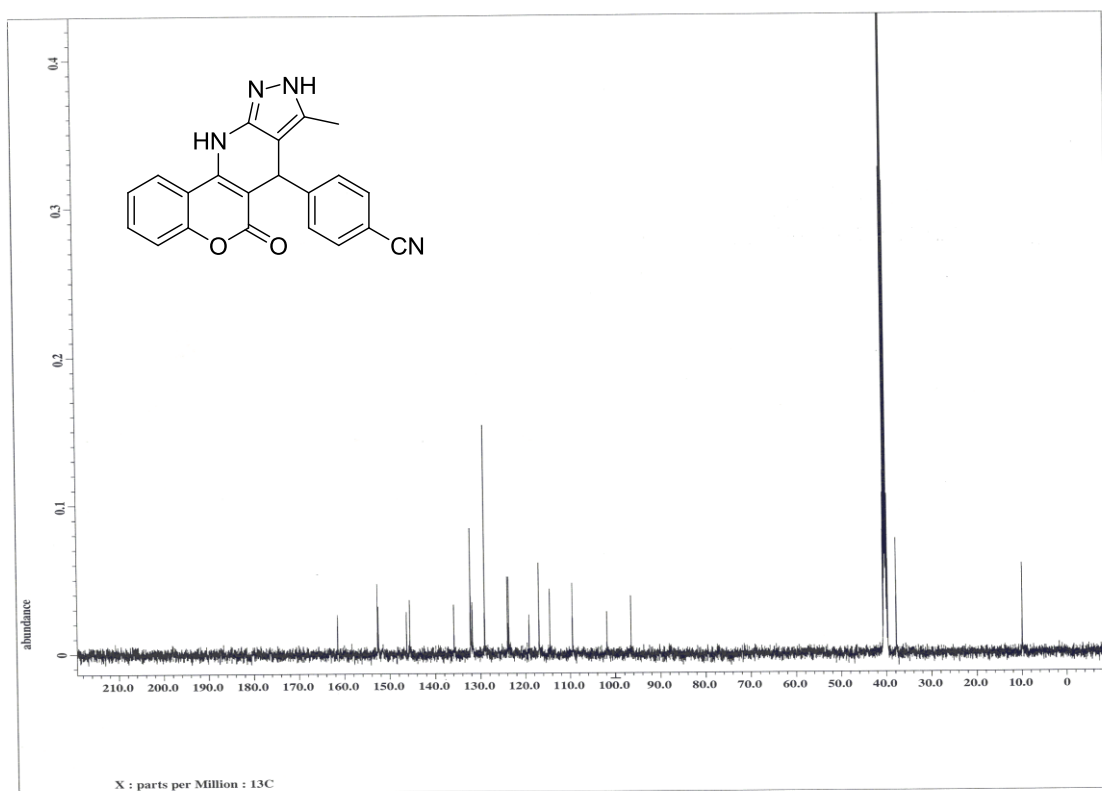

# Copies of $^1\text{H}$ and $^{13}\text{C}$ NMR spectra of compound 1f

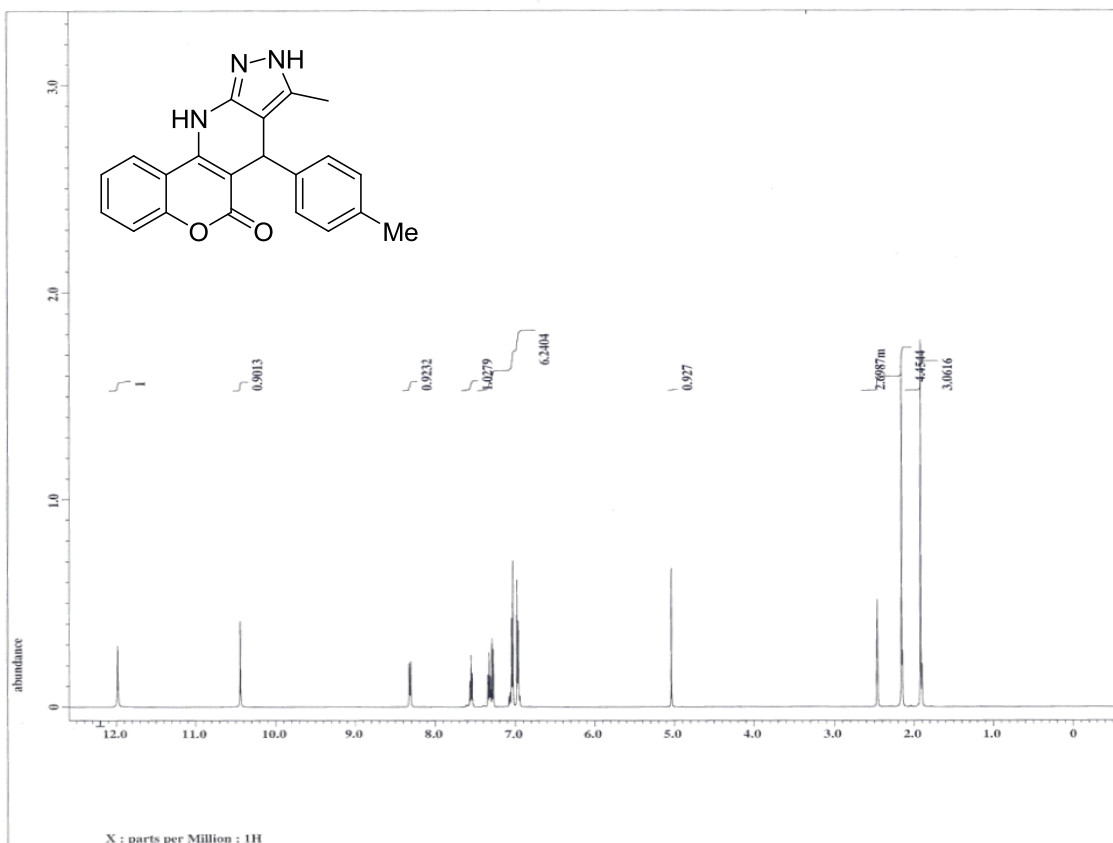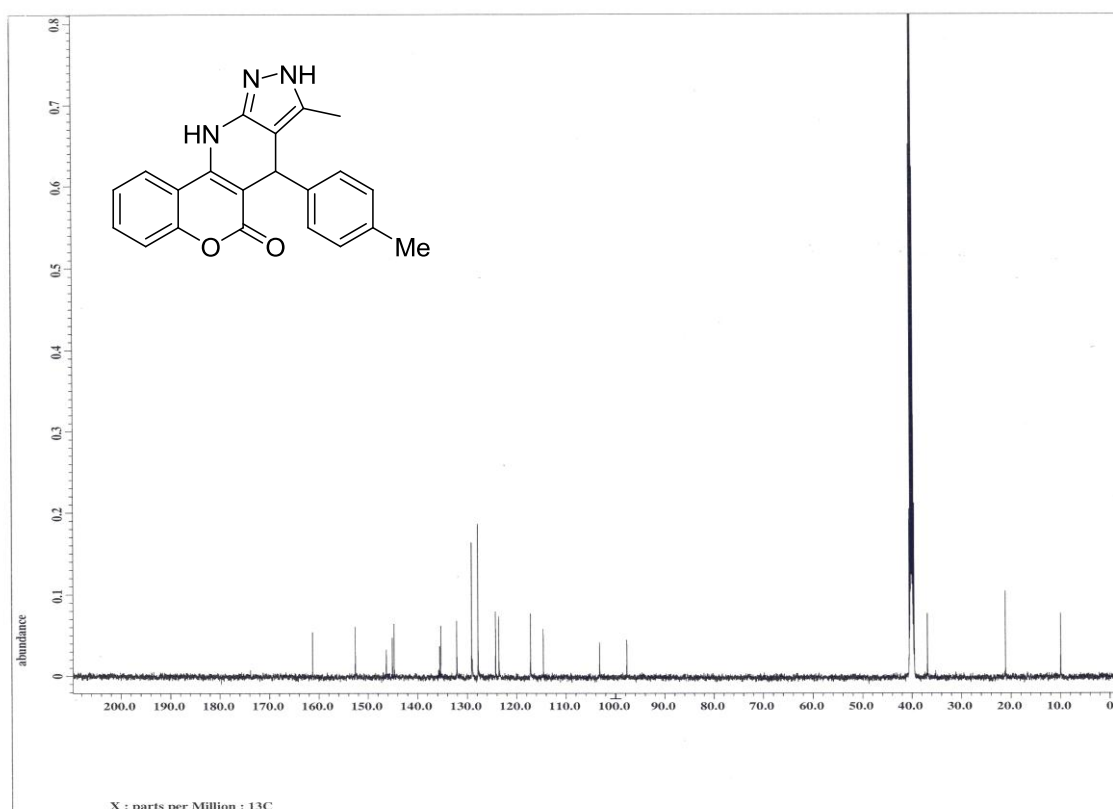



# Copies of $^1\text{H}$ and $^{13}\text{C}$ NMR spectra of compound 1g

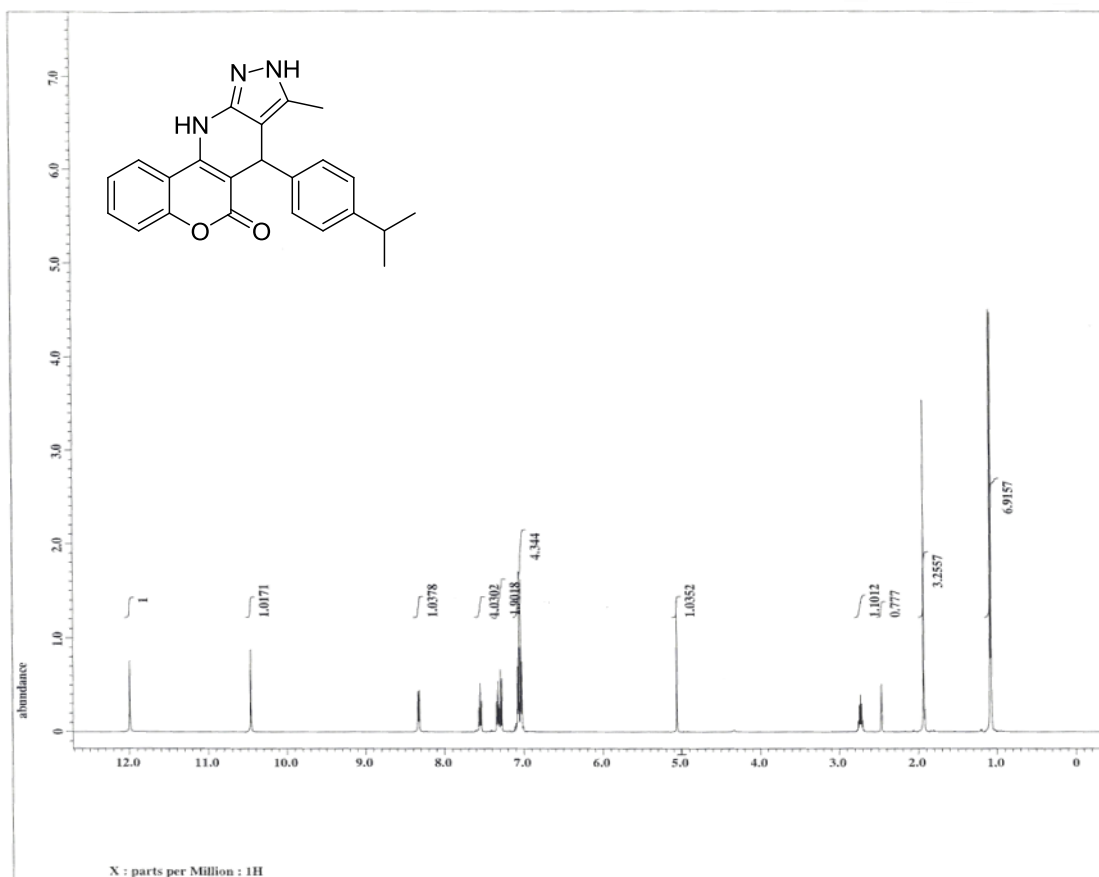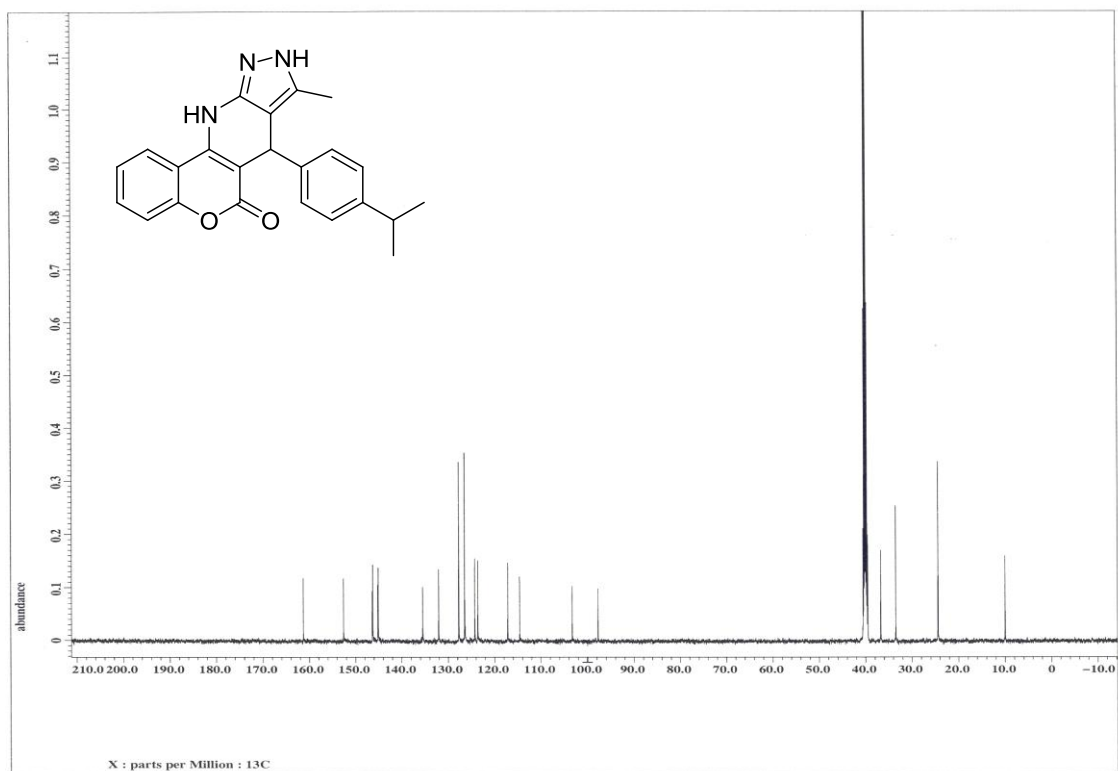

# Copies of $^1\text{H}$ and $^{13}\text{C}$ NMR spectra of compound 1h

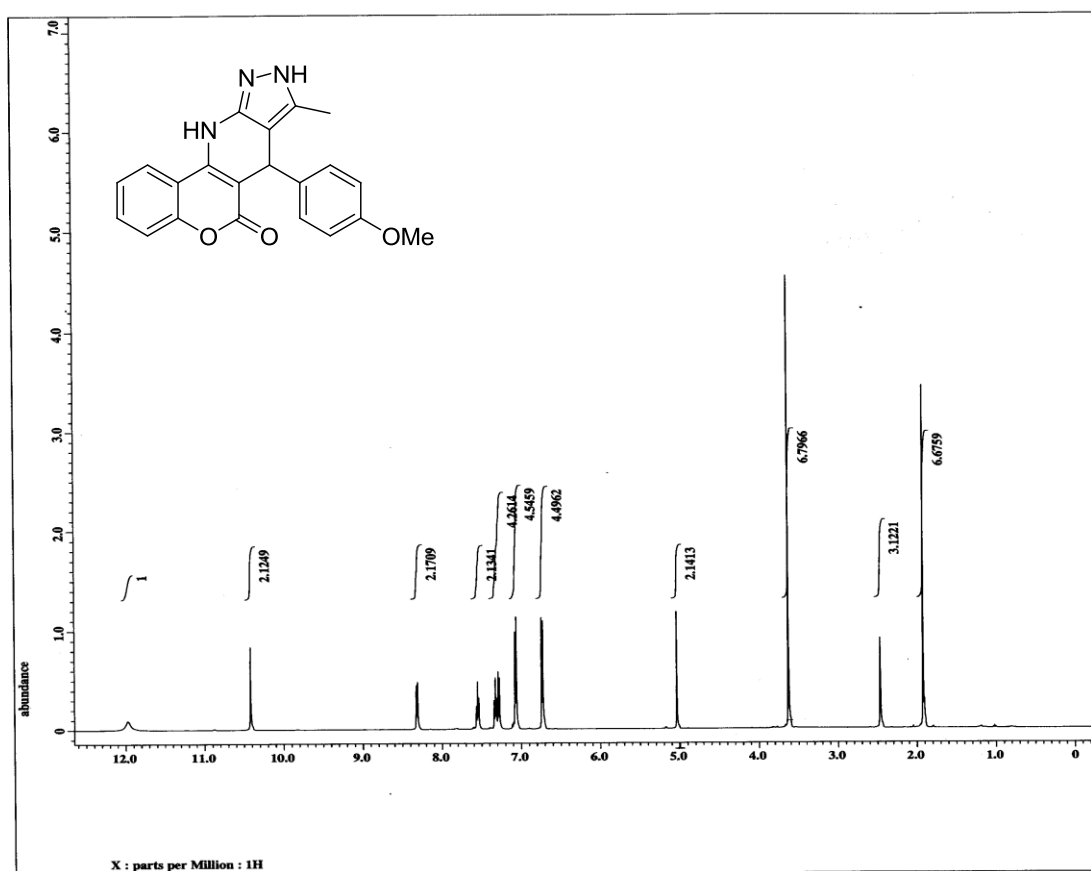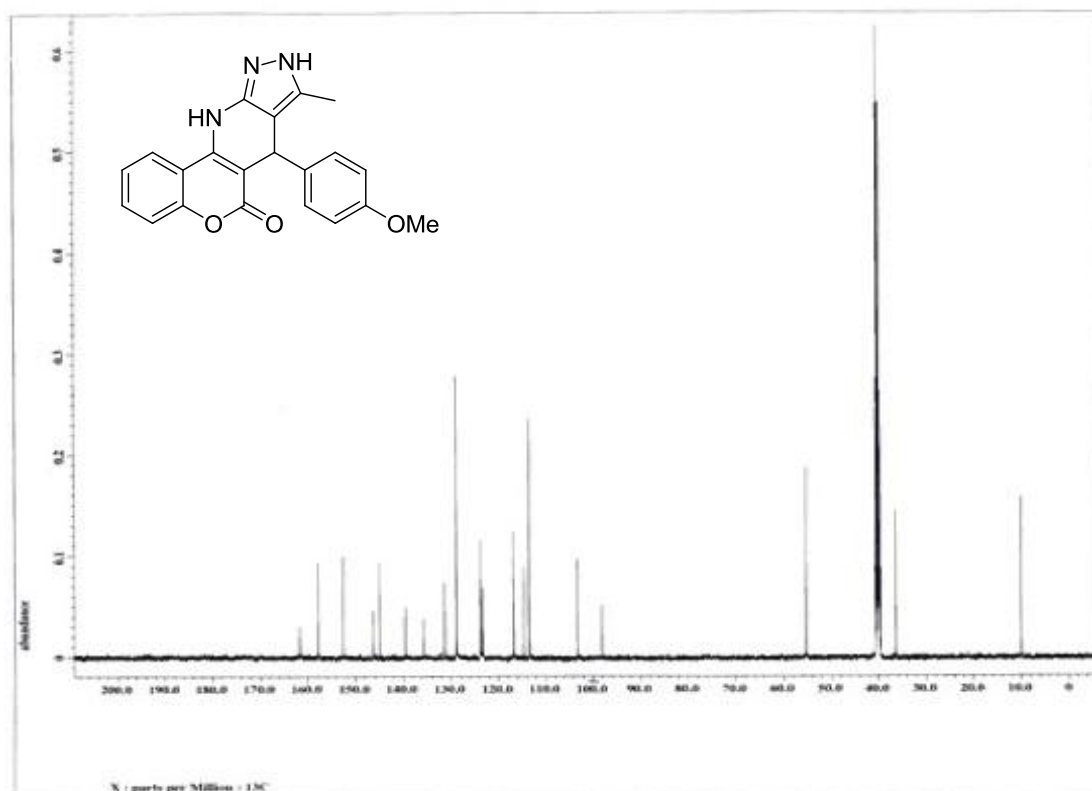

## Copies of $^1\text{H}$ and $^{13}\text{C}$ NMR spectra of compound 1i

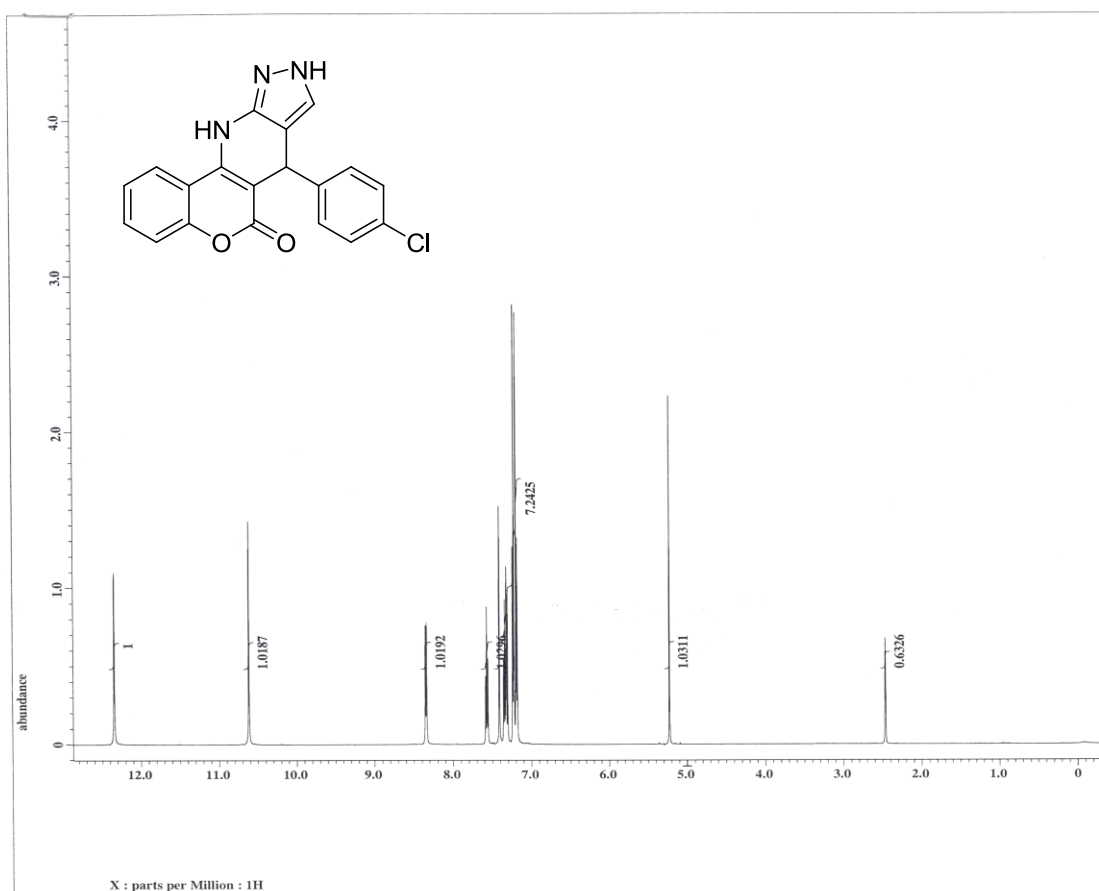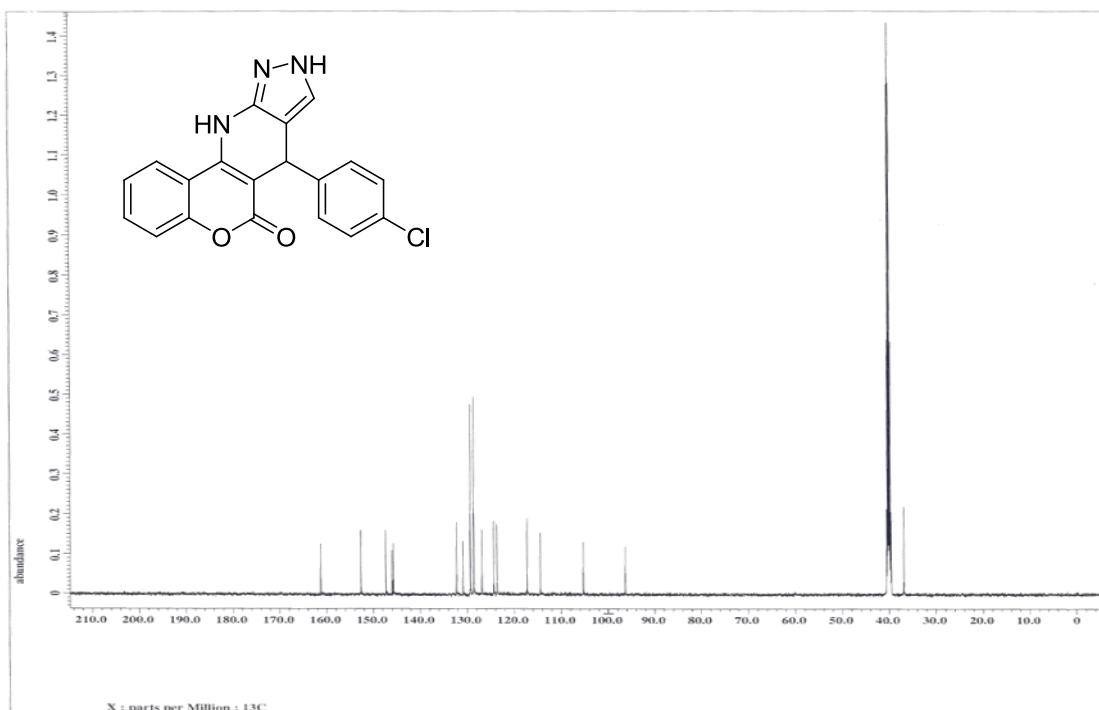

# Copies of $^1\text{H}$ and $^{13}\text{C}$ NMR spectra of compound 1j

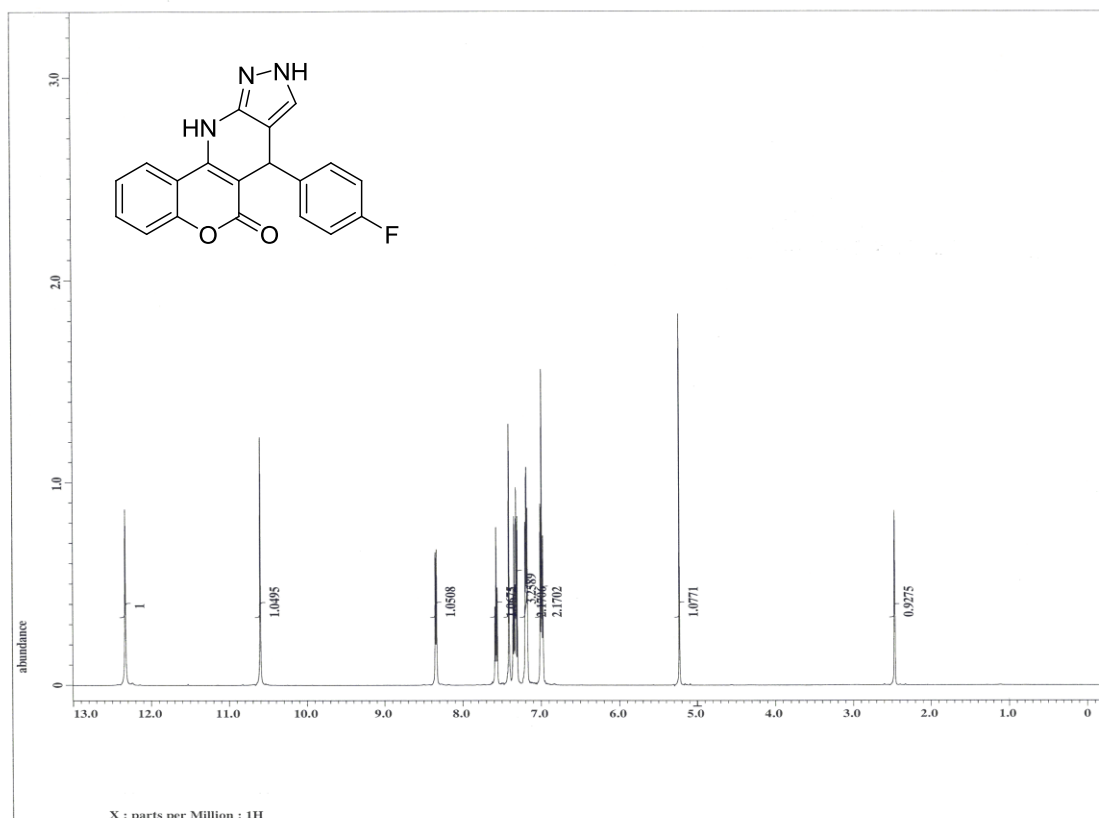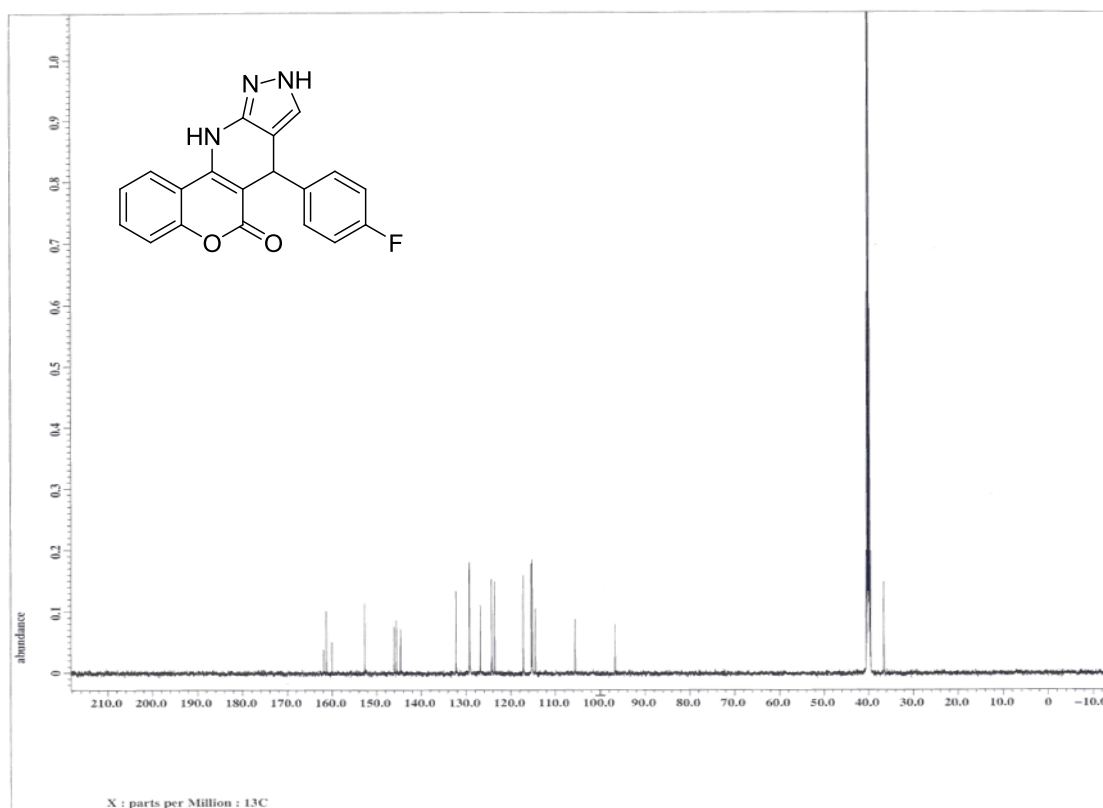



## Copies of $^1\text{H}$ and $^{13}\text{C}$ NMR spectra of compound 11

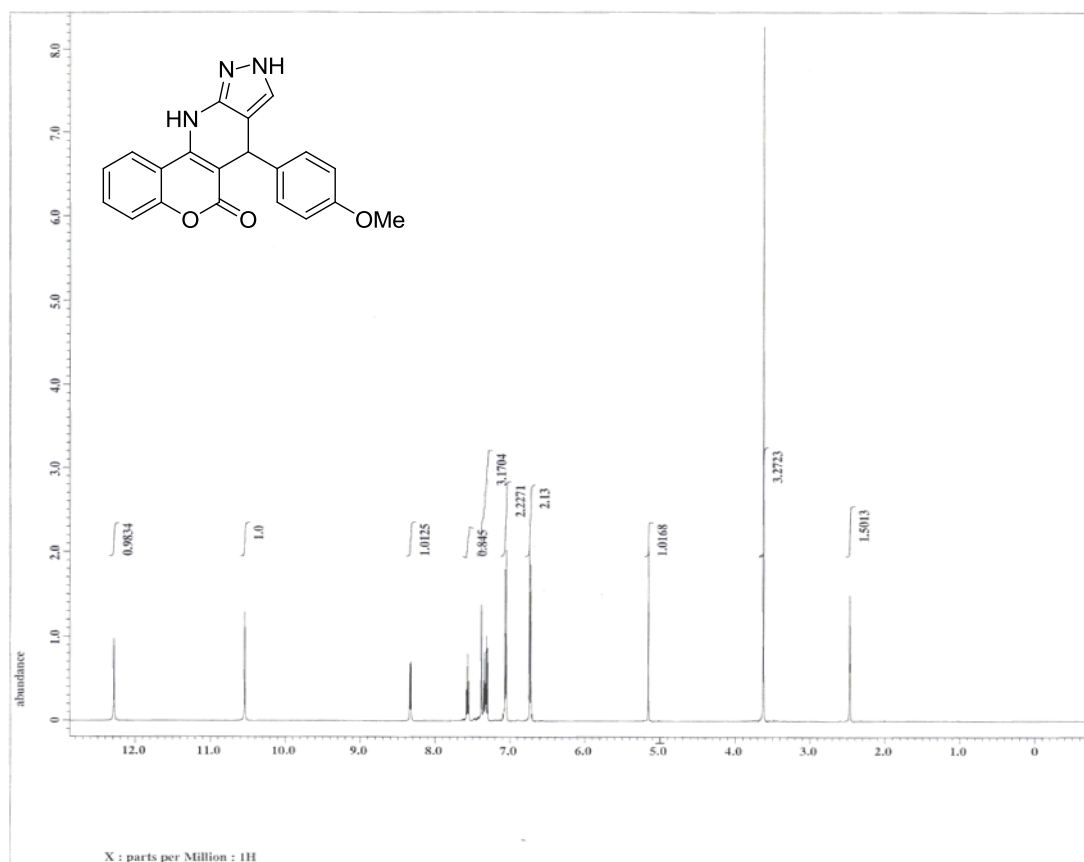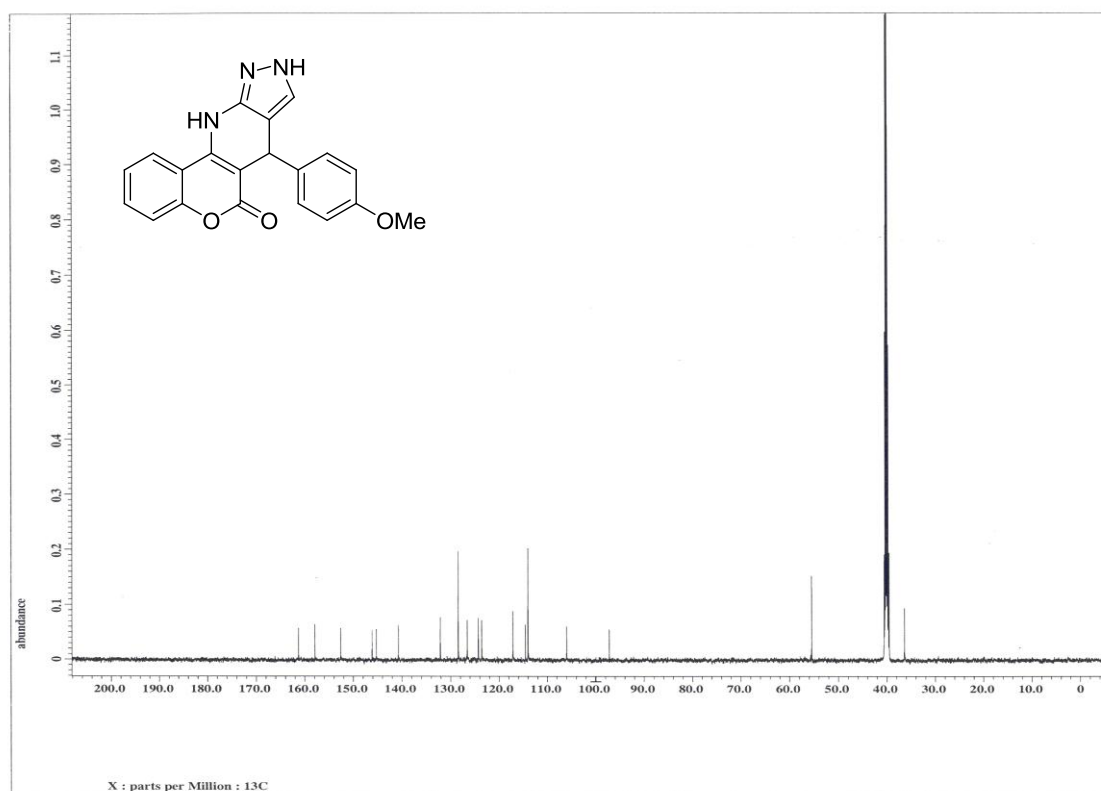

# Copies of $^1\text{H}$ and $^{13}\text{C}$ NMR spectra of compound 1m

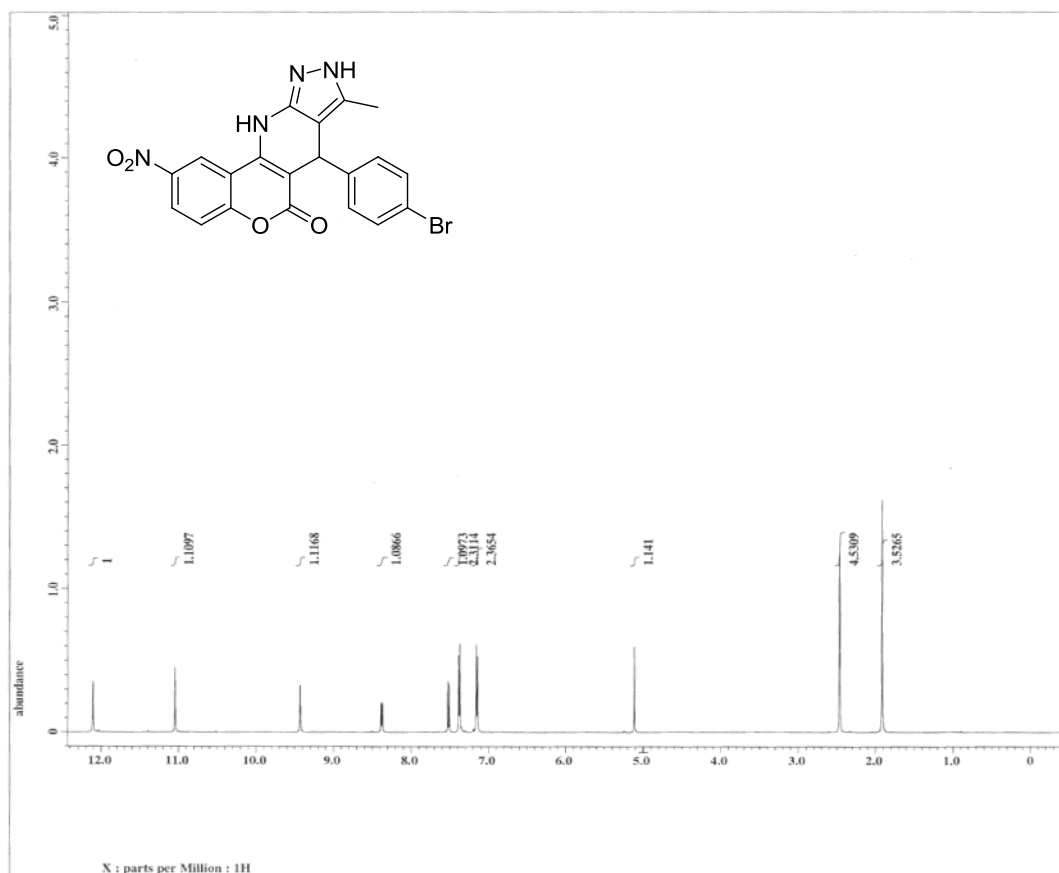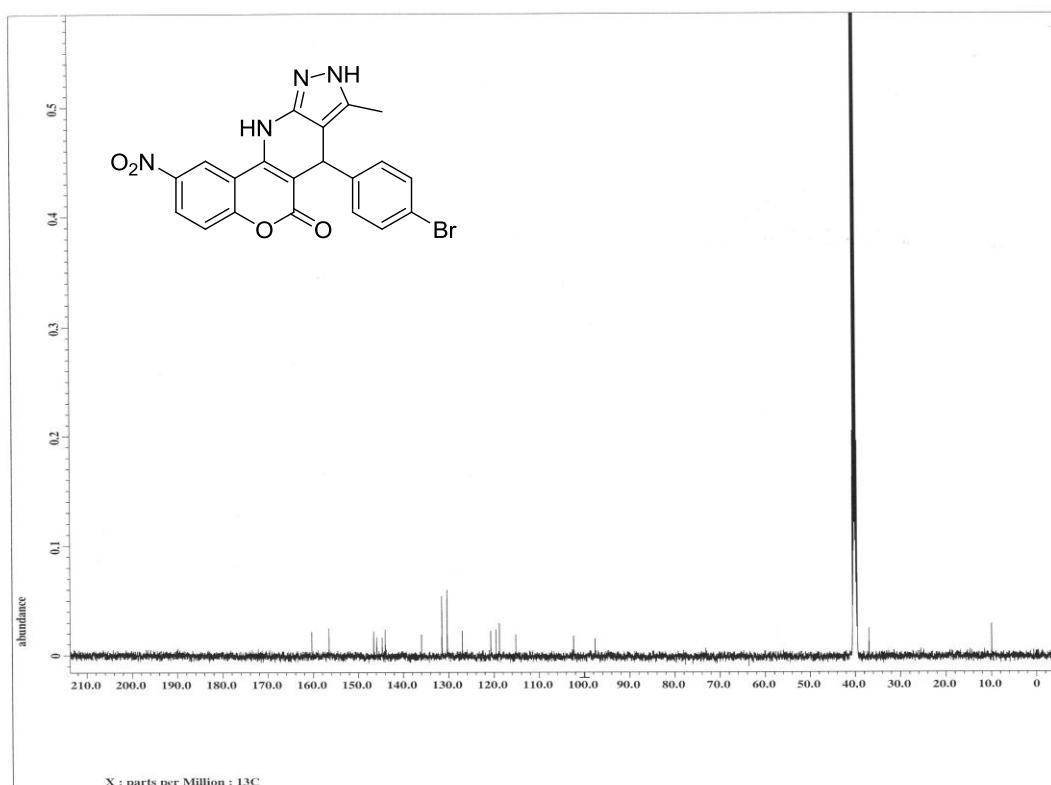

# Copies of $^1\text{H}$ and $^{13}\text{C}$ NMR spectra of compound 1n

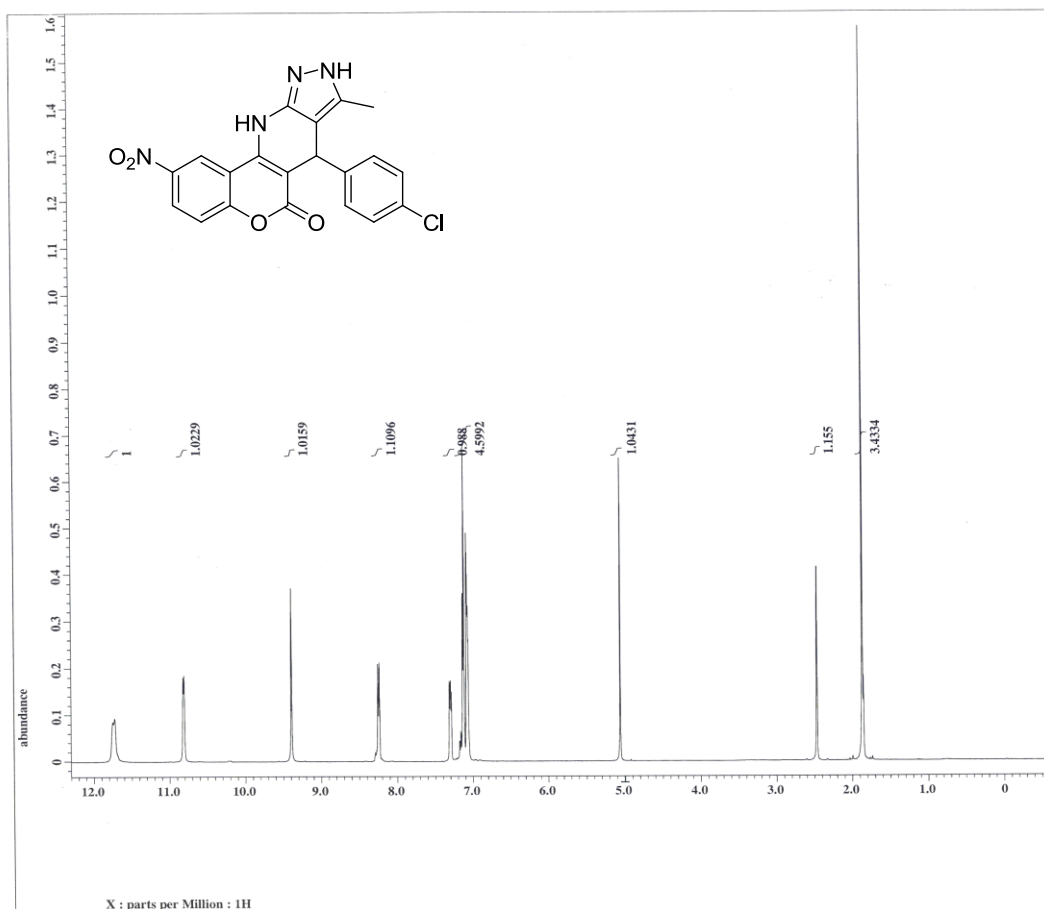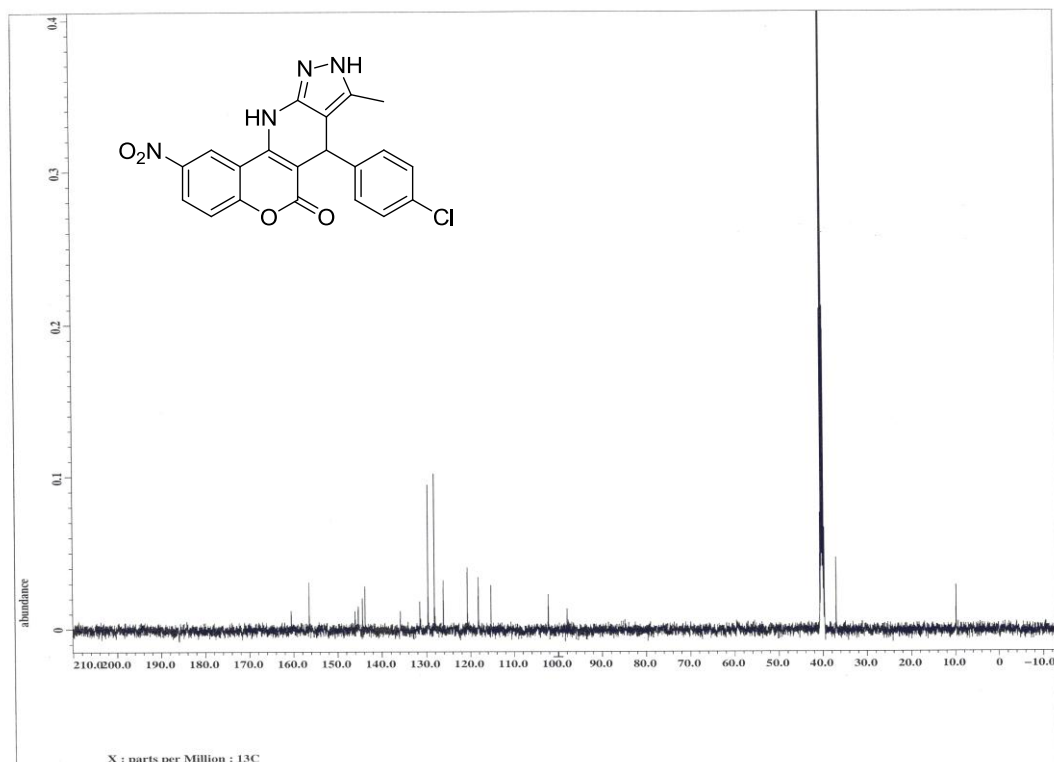



# Copies of $^1\text{H}$ and $^{13}\text{C}$ NMR spectra of compound 1o

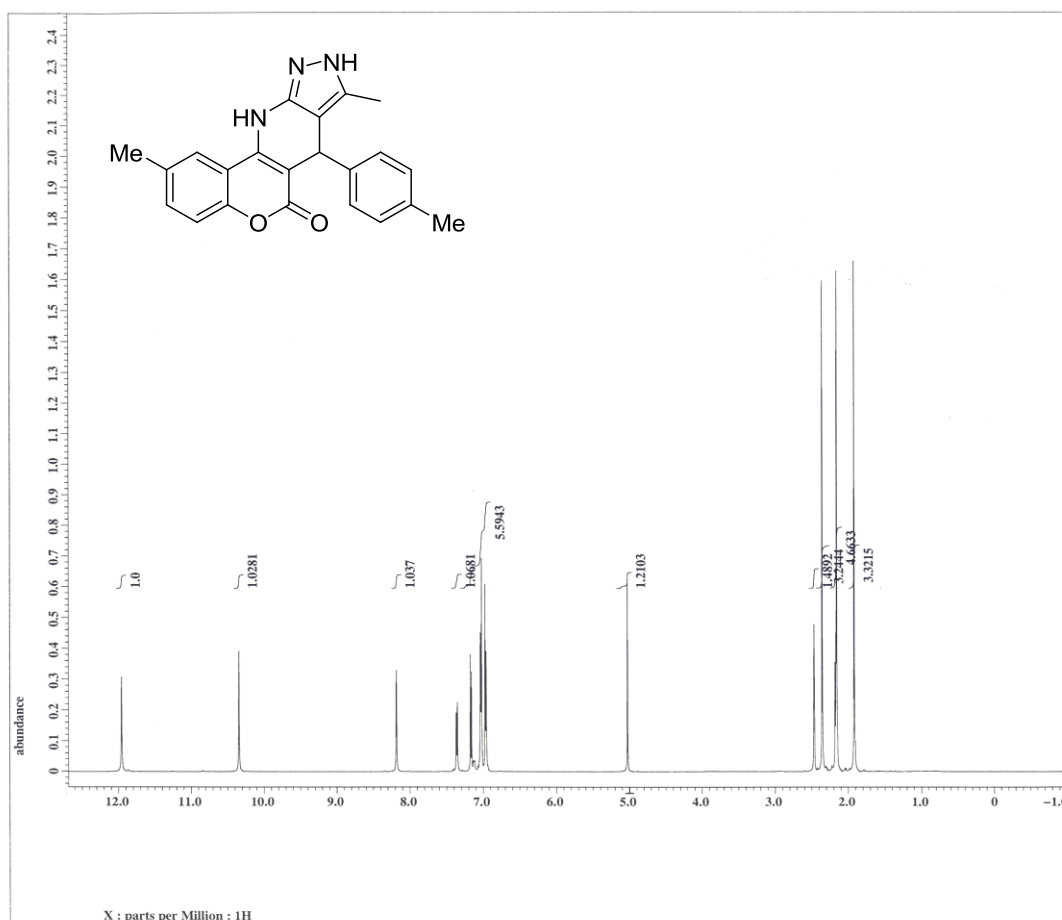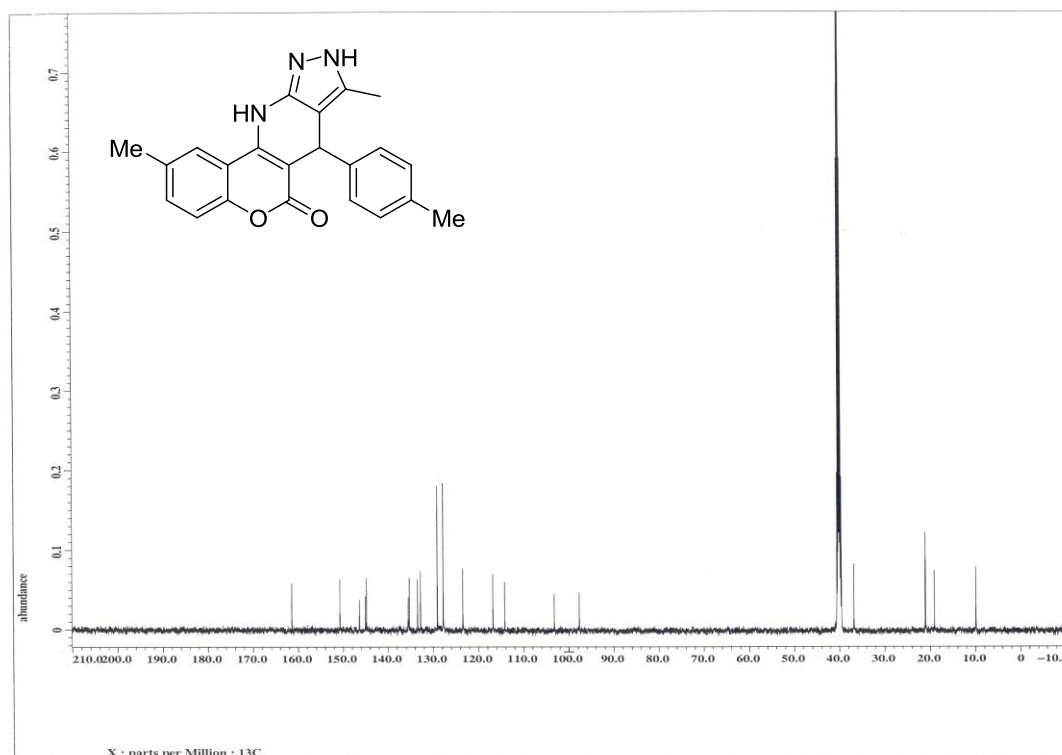

# Copies of $^1\text{H}$ and $^{13}\text{C}$ NMR spectra of compound 1p

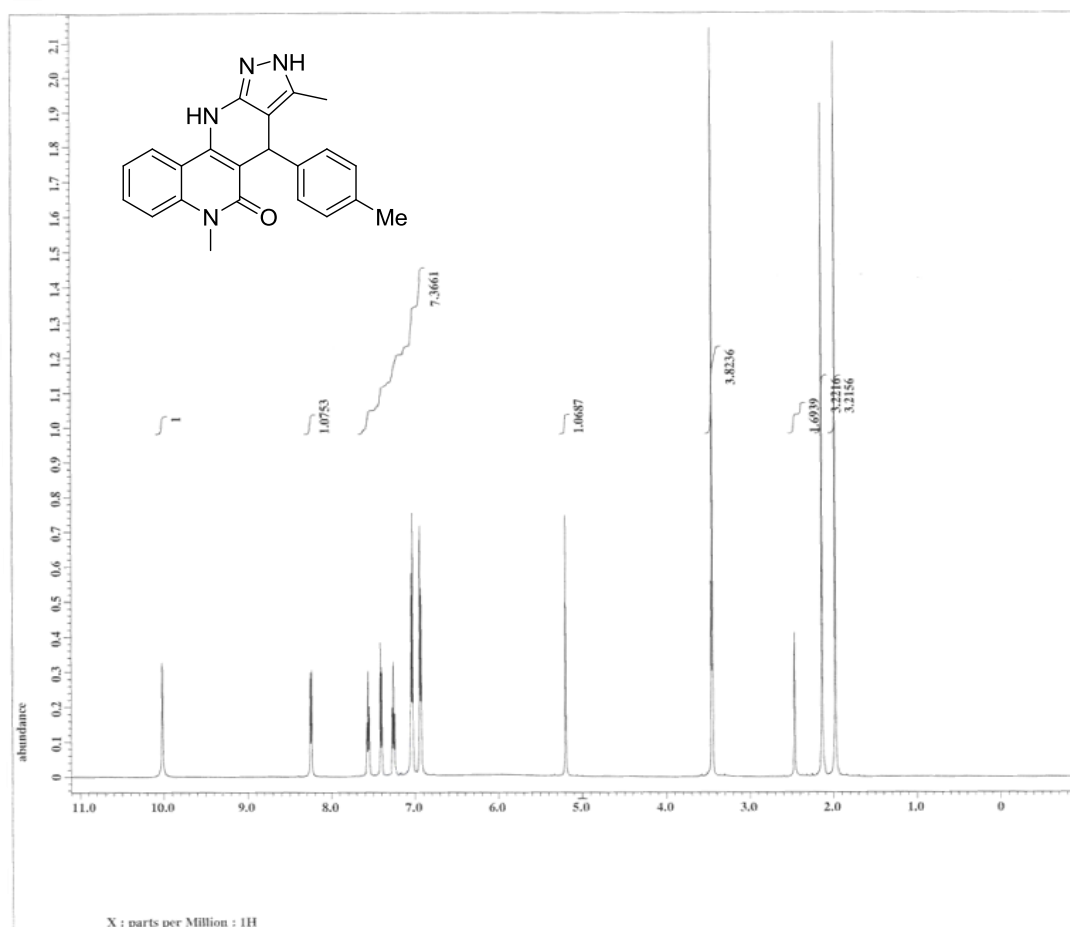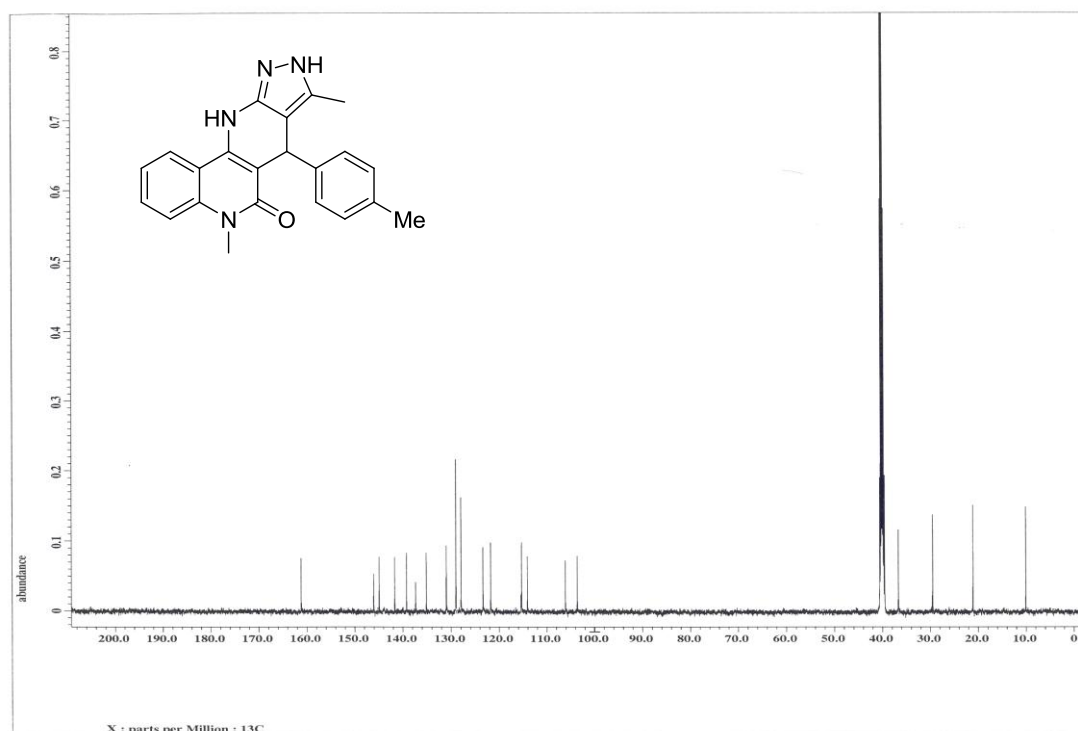

Copies of  $^1\text{H}$  and  $^{13}\text{C}$  NMR spectra of compound 2a

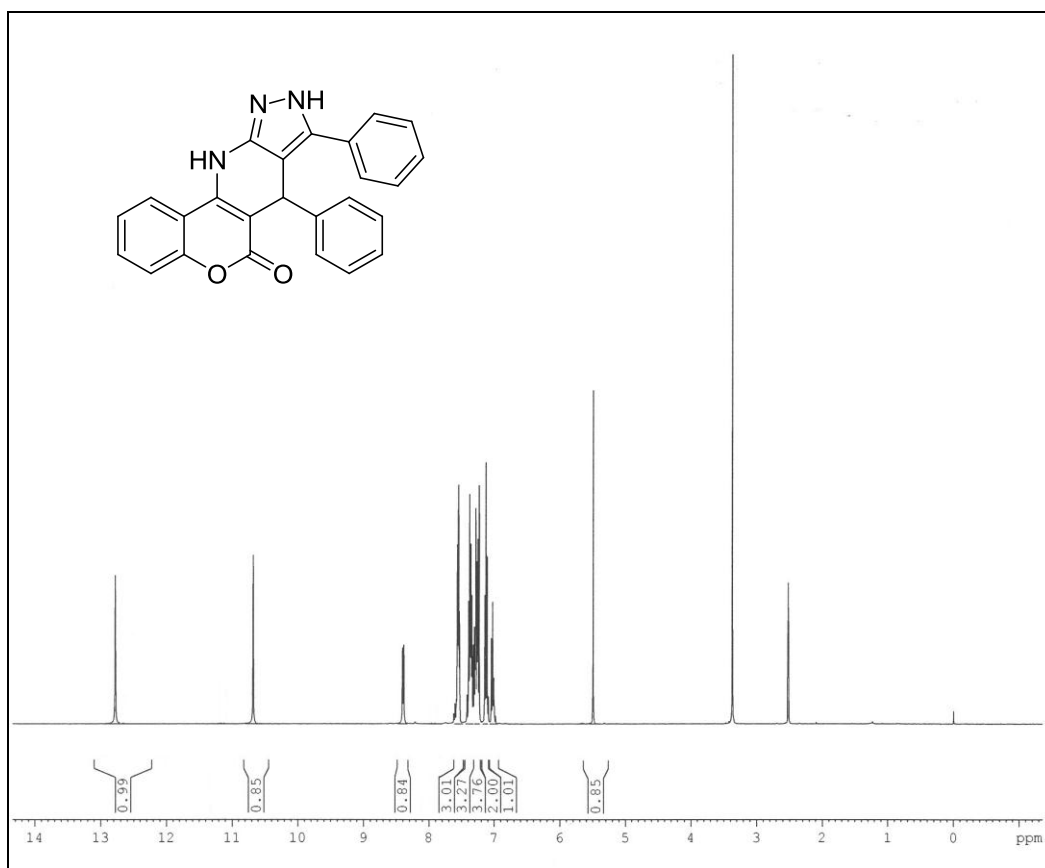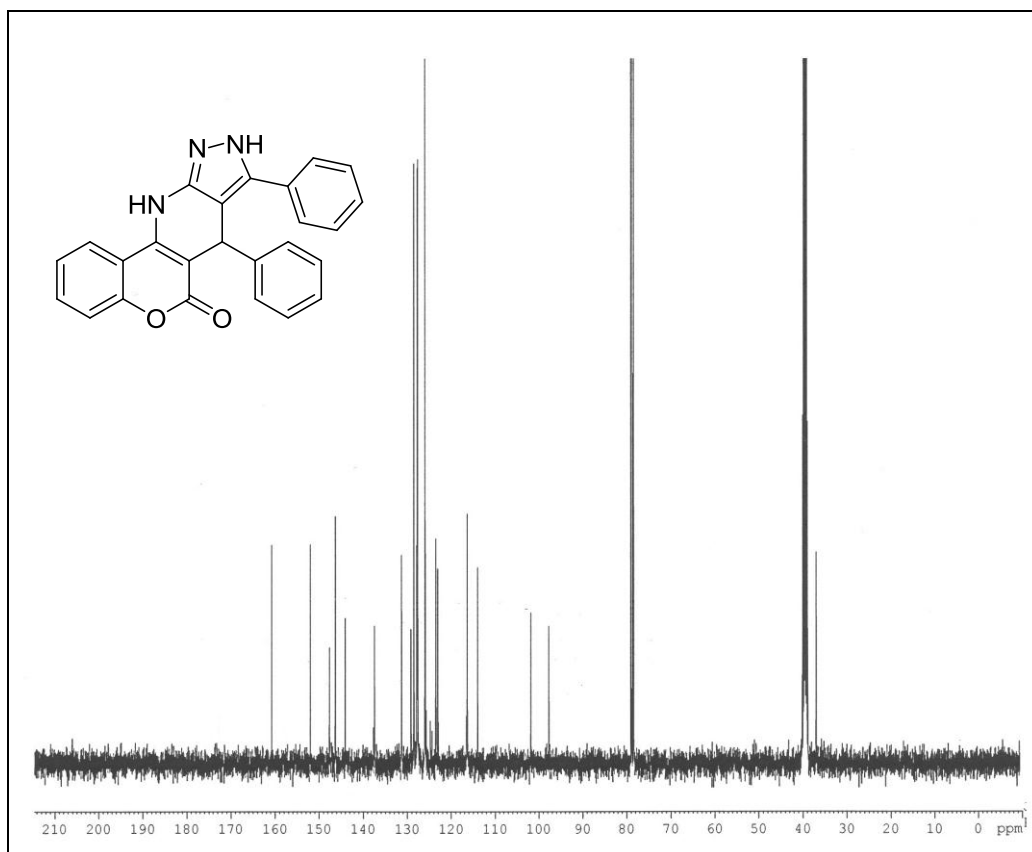

# Copies of $^1\text{H}$ and $^{13}\text{C}$ NMR spectra of compound 2b

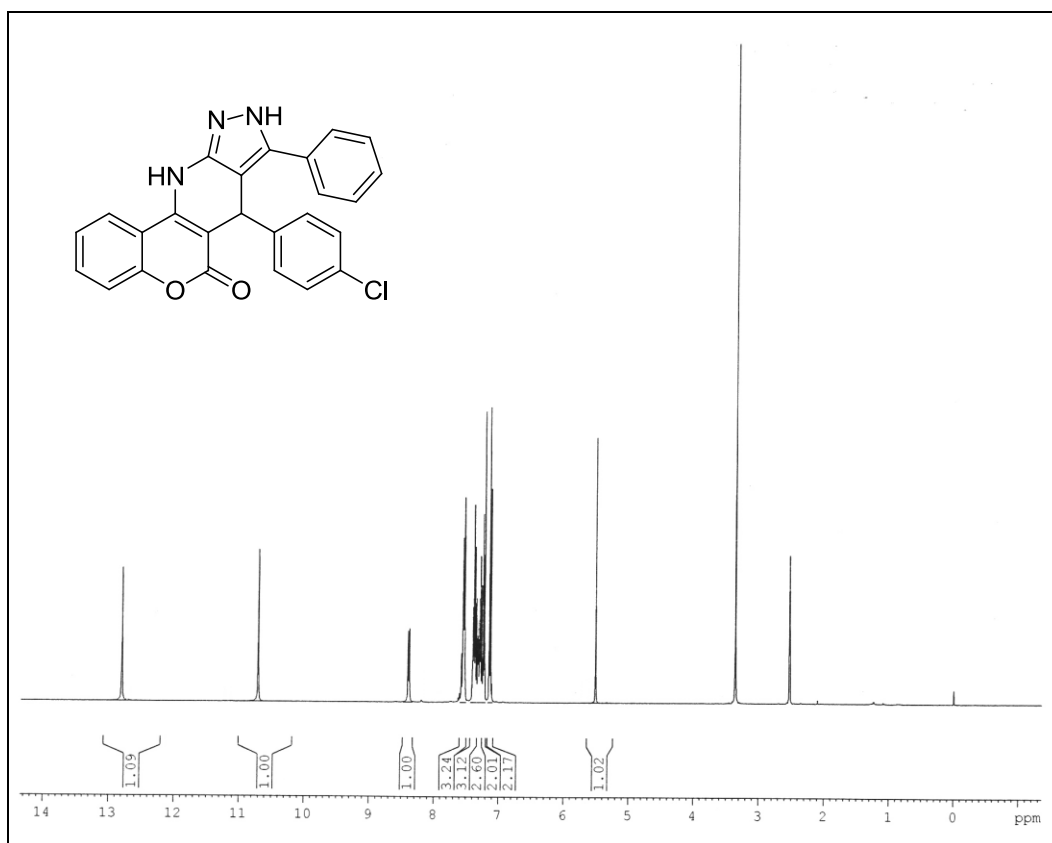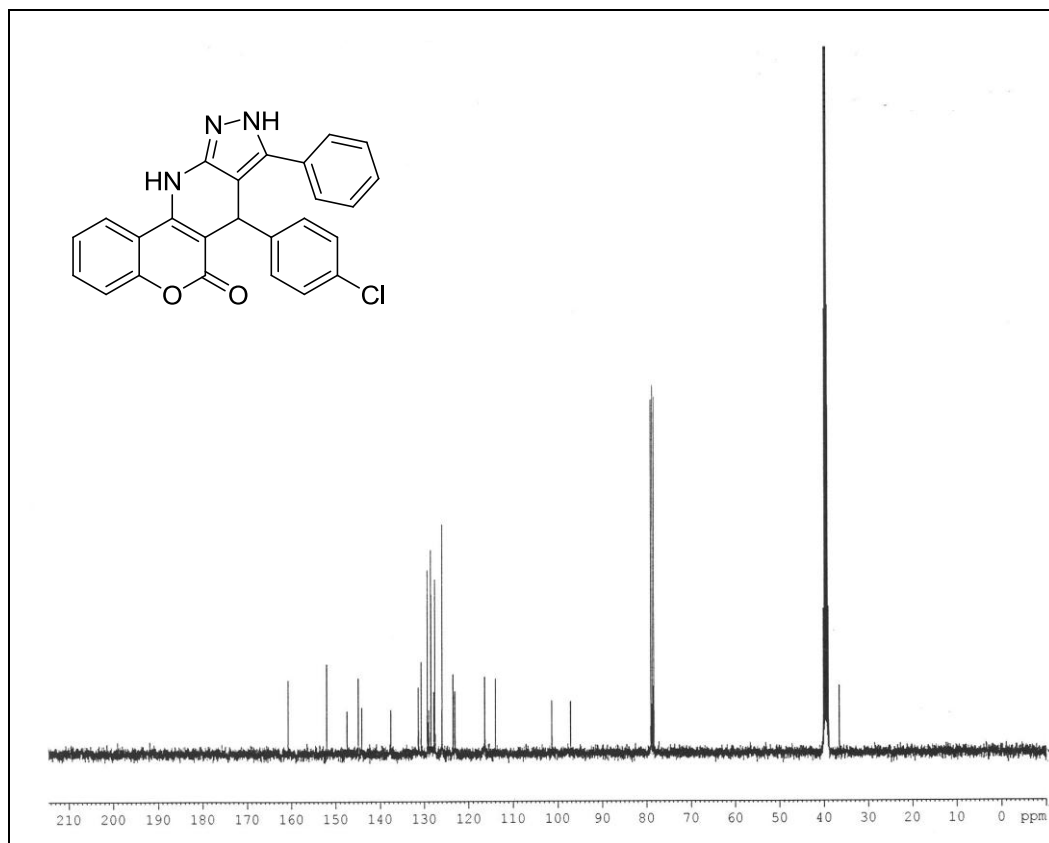

Copies of  $^1\text{H}$  and  $^{13}\text{C}$  NMR spectra of compound 2c

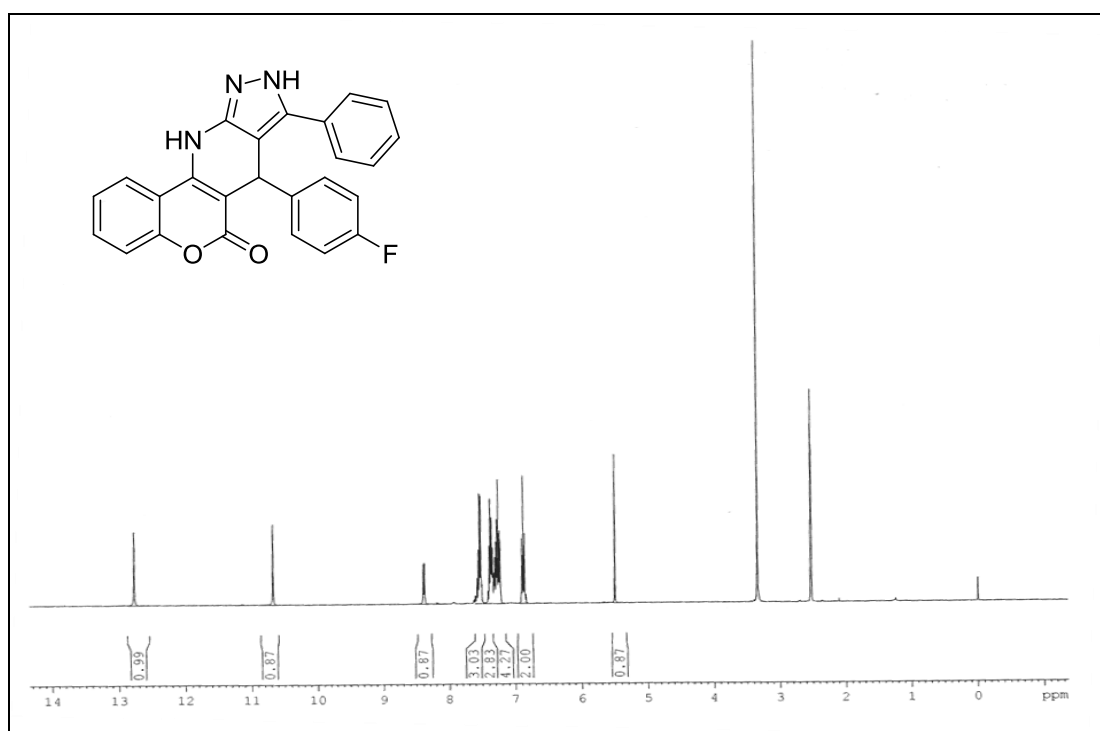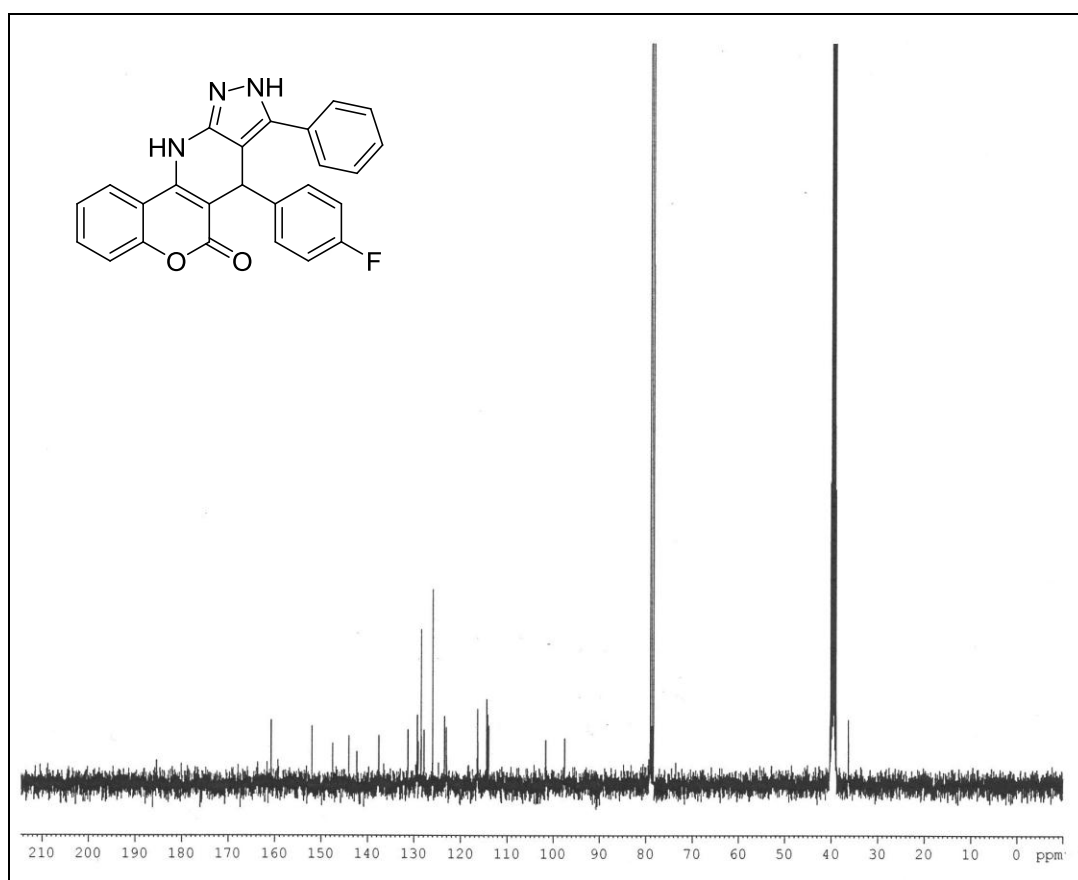

Copies of  $^1\text{H}$  and  $^{13}\text{C}$  NMR spectra of compound 2d

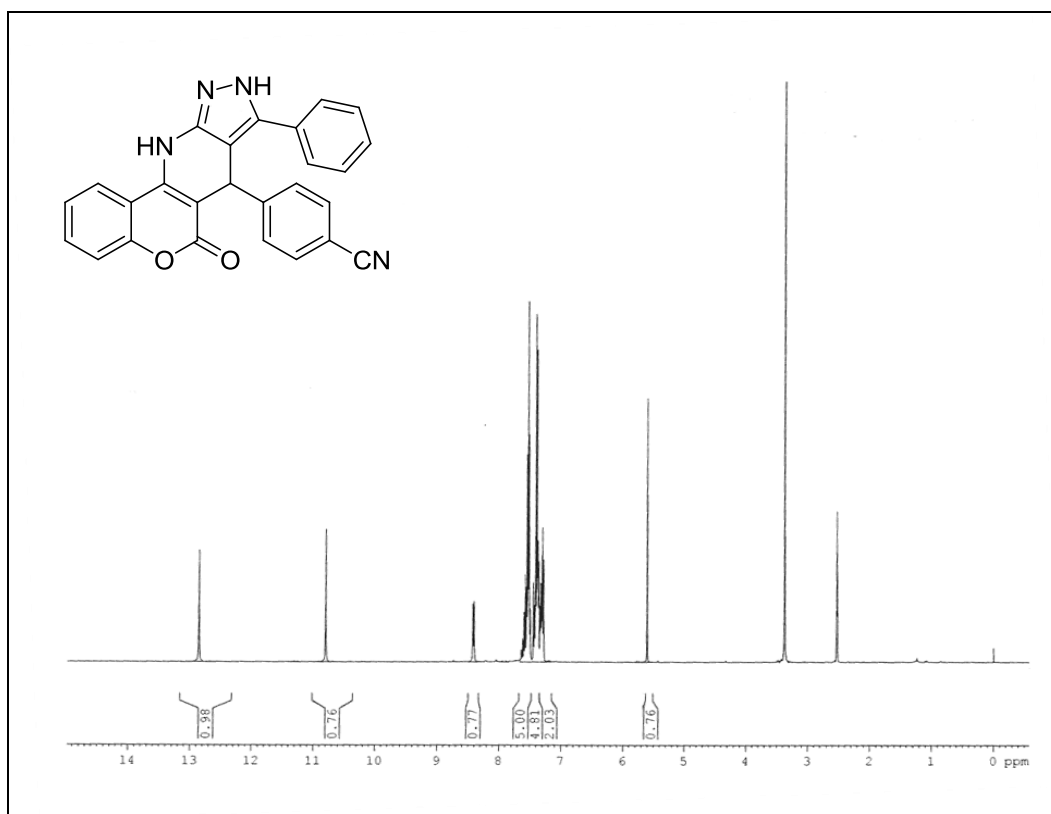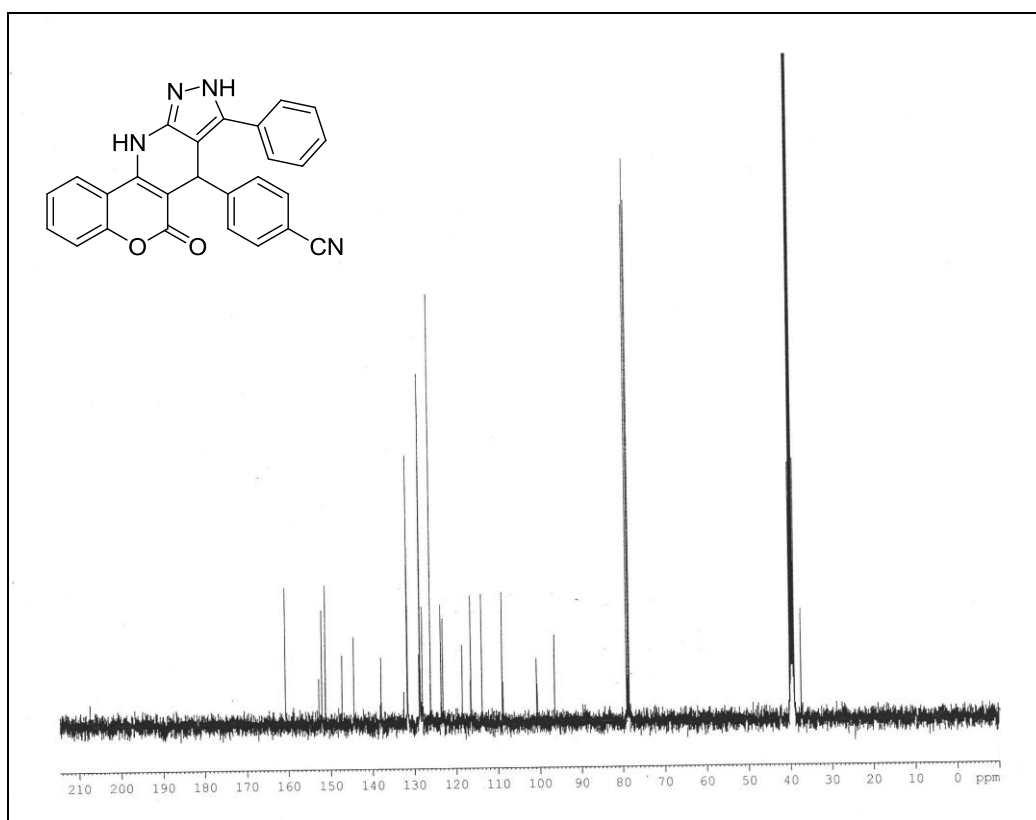

Supplement: c3ra41569d.pdf [file c3ra41569d.pdf]
